1 **Efficacy and Safety of Chinese Herbal Injection Thoracic Perfusion**  
2 **combined with Cisplatin chemotherapy for Lung Cancer Malignant**  
3 **Pleural Effusion: A Systematic Review and Meta-Analysis**

4 Zhong-Ning He<sup>1†</sup>, Ming-Wan Su<sup>1†</sup>, Jie-He<sup>1,2†</sup>, Guang-Hui Zhu<sup>1†</sup>, Yu-Wei Zhao<sup>1†</sup>, Shu-Lin He,<sup>1,2</sup>  
5 Yue Li<sup>1,2</sup>, Bo-Lun Shi<sup>1</sup>, Jia-Qi Hu<sup>1,2</sup>, Shun-Tai Chen<sup>2\*</sup>, Bao-Jin Hua<sup>1\*</sup>

6 <sup>1</sup>Guang'anmen Hospital, China Academy of Chinese Medical Sciences, Beijing, China

7 <sup>2</sup>Beijing University of Chinese Medicine, Beijing, China

8 **\* Correspondence:**

9 Shun-Tai Chen, Bao-Jin Hua share co-correspondence

10 qdyc31236@163.com, huabaojinxs@126.com

11 †Zhong-Ning He, Ming-Wan Su, Jie-He Guang-hui Zhu and Yu-Wei Zhao share co-first author.

12 **Purpose** To evaluate the efficacy and safety of Chinese herbal injection thoracic perfusion combined  
13 with cisplatin chemotherapy for lung cancer patients with MPE.

14 **Method** Eight databases were searched for articles published from inception to August 20, 2022 for  
15 randomized-controlled trials (RCTs) that are relevant. The included studies were reviewed by two  
16 investigators, with relevant data extracted independently. Primary outcome was identified as  
17 objective response rate (ORR), while secondary outcomes were identified as quality of life (QOL)  
18 and adverse reactions. Quality of the included trials was assessed through risk of bias assessment of  
19 the Cochrane risk-of-bias tool. The Revman5.3 and Stata17.0 software were used to calculate risk  
20 ratio (RR) at 95% confidence intervals (CI) for binary outcomes.

21 **Results** 29 RCTs involving 1887 patients were included in this study. Compared with patients treated  
22 with cisplatin thoracic perfusion alone, those with Chinese herbal injection and cisplatin thoracic  
23 perfusion had better therapeutic effects (RR=1.44, 95% CI: 1.35~1.53, P = 0.000), higher KPS score  
24 (RR = 1.47, 95%CI: 1.34~1.61, P = 0.0000), lower digestive tract reaction(RR = 0.56, 95%CI:  
25 0.48~0.67, P = 0.000) , bone marrow suppression (RR = 0.50, 95% CI: 0.43~0.59, P =0.000) and  
26 chest pain reactions (RR = 0.65, 95%CI: 0.47~0.89, P = 0.007).

27 **Conclusion** The systematic review indicated that Chinese herbal injection thoracic perfusion  
28 combined with cisplatin chemotherapy may improve therapeutic effect, quality of life, and reduce  
29 adverse reactions. More large-scale and higher quality RCTs are warranted to support our findings.  
30 Systematic Review Registration: PROSPERO, identifier CRD42022347345.

31 **Keywords:** Chinese Herbal, lung cancer, malignant pleural effusion, cisplatin , thoracic perfusion,  
32 systematic review, meta-analysis

## 33 **1 Introduction**

34 Lung cancer is one of the most common malignant tumors in the world, with high morbidity and  
35 mortality<sup>[1]</sup>, Malignant Pleural Effusion (MPE) is a common complication in lung cancer patients.  
36 and the median survival time is only 5.5 months<sup>[2]</sup>. The occurrence of MPE is associated with poor  
37 quality of life (QOL) and shorter survival time in lung cancer patients<sup>[3]</sup>. Thus, effective treatment for  
38 MPE appears very important. The main purpose is to control the effusion from growth, relieve  
39 dyspnea, improve the quality of survival, to extend the survival. Currently, management options for  
40 MPE includes chest tube drainage and systematic chemotherapy to achieve symptomatic relief and  
41 controlling the primary malignancies. Thoracic perfusion of chemotherapeutic is an effective method  
42 for the treatment of MPE, and thoracic perfusion of cisplatin has good pharmacodynamics<sup>[4, 5]</sup>, high  
43 economic practicability<sup>[6]</sup>. However, the side effects of cisplatin, such as gastrointestinal reactions

44 and hepatorenal toxicity, cannot be ignored, and will affect the quality of life of patients to a certain  
45 extent<sup>[7]</sup>. Therefore, current management approach remain palliative. Thus, we seek to find an  
46 effective combined treatment for MPE. In recent years, related studies have shown that anti-tumor  
47 Chinese herbal injection thoracic perfusion combined with cisplatin chemotherapy in the treatment of  
48 MPE have a positive effect in improving efficiency, improve the quality of life, reduce adverse  
49 reactions<sup>[8-10]</sup>. Although the clinical studies on Chinese herbal injection in the treatment of lung  
50 cancer MPE are increasing, the long-term efficacy has not been measured. Lack of high quality, neat  
51 standard clinical research, In order to obtain higher evidence data, this study using evidence-based  
52 medicine method, comprehensive collection published in Chinese and English literature at present,  
53 the systematic evaluation of Chinese herbal injection thoracic perfusion combined with cisplatin  
54 chemotherapy of lung cancer MPE, curative effect in order to provide a basis for evidence based  
55 medicine in the future clinical treatment.

## 56 **2 METHODS**

57 This study was conducted following the Preferred Reporting Items for Systematic Reviews and  
58 Meta-Analyses (PRISMA) guidelines<sup>[11]</sup>. The protocol has been registered in PROSPERO  
59 (registration number: CRD42022347345).

## 60 **3 Search strategy**

61 An independent review of citations was searched for articles published from inception to August 20,  
62 2022, relevant publications evaluating the efficacy and safety of Chinese herbal injection for Lung  
63 cancer with MPE were searched in the Chinese National Knowledge Infrastructure (CNKI), Wanfang  
64 Database, the VIP Information Database, Chinese Biomedical Literature database (CBM), PubMed,  
65 EMBASE, and the Cochrane Library. The following Key words were used: “Lung Neoplasms OR  
66 Lung Cancer” AND “Pleural Effusion, Malignant OR Malignant Pleural Effusion” AND “Cisplatin”

67 AND “Elemene injection OR Kushen injection OR Kanglaite injection OR Brucea Javanica oil  
68 emulsion OR Yuxingcao injection OR Aidi injection OR Xiao-ai-ping injection OR Huachansu  
69 injection OR Shenqifuzheng injection OR Kang-Ai injection OR Kushenhuangqi injection”. All  
70 retrievals were implemented using MeSH and free words (the detailed search strategy is available in  
71 Supplementary 1). The languages were restricted to Chinese and English.

#### 72 **4 Study selection and data extraction**

73 Eligible studies were randomized controlled trials of lung cancer adults ( $\geq 18$ ) with MPE  
74 involving Chinese herbal injection thoracic perfusion combined with cisplatin chemotherapy  
75 comparing to cisplatin thoracic perfusion alone. We defined intervened injections as Elemene  
76 injection, Kushen injection, Kanglaite injection, Brucea Javanica oil emulsion, Yuxingcao injection,  
77 Aidi injection, Xiao-ai-ping injection, Huachansu injection, Shenqifuzheng injection, Kang-Ai  
78 injection, Kushenhuangqi injection etc. Studies were excluded if patients were treated with other  
79 chemotherapy.

80 Two reviewers Ming-Wan Su and Jie-He independently selected studies based on the inclusion and  
81 exclusion criteria described above. Two reviewers independently extracted details for each trial: first  
82 author name and year of publication, patient characteristics; Intervention: Chinese herbal injection,  
83 Cisplatin ingredients, dose, treatment time; primary and secondary outcome measures. Missing  
84 information can be obtained by contacting the author.

#### 85 **5 Data synthesis and analysis**

86 The primary outcome measure is objective remission rate (ORR) of MPE which was defined as CR +  
87 PR<sup>[12]</sup>. Quality of life (QOL) evaluated with Karnofsky score. Adverse events (digestive tract  
88 reactions, bone marrow suppression, chest pain) are second outcome measures. The data were  
89 processed and analyzed by Stata 17.0 (Stata Corp, College Station, SE). Random-effects models were

90 performed to calculate pooled effects. Fixed-effect models were performed if statistical heterogeneity  
91 was absent (heterogeneity test,  $P \geq 0.10$ ), dichotomous data were presented as pooled Risk Ratio  
92 (RR) with 95% confidence intervals (95% CIs), Assessment of heterogeneity was performed using  
93 Cochran's Q test and Higgins's  $I^2$ ;  $I^2 > 50\%$  and a P value  $< 0.10$  suggested significant  
94 heterogeneity<sup>[13]</sup>. Sensitivity analysis was performed by sequentially omitting each study to examine  
95 the robustness of the results. Potential publication bias was evaluated using Begg's funnel plot and  
96 Egger's test<sup>[14]</sup>.

## 97 **6 Risk of Bias Assessment**

98 Two reviewers Zhong-Ning He and Guang-Hui Zhu independently assessed the quality of the  
99 selected trials according to the RCT trials tool of the Cochrane Collaboration. Items were divided  
100 into three categories: low risk bias, unclear bias and high-risk bias. The following features are  
101 random sequence generation (selection bias), concealment of assignment (selection bias), blinding of  
102 participants, personnel (performance bias), outcome data were incomplete (attrition bias), selective  
103 reporting (reporting bias), and other bias. These assessments are plotted and evaluated using Review  
104 Manager 5.3.

## 105 **7 Result**

### 106 **7.1. Search Result**

107 Initially 281 literatures from 7 electronic databases were identified. After the removal of 98  
108 duplications and 55 irrelevants after screening through the title and abstract, 43 articles were consider  
109 potentially appropriate for inclusion. Among which, 14 articles were excluded for the following  
110 reasons: not lung cancer patient (n=2), not thoracic perfusion (n=4), Chinese herbal injection  
111 intervention alone (n=6), Chinese herbal injection with other chemotherapy (n=2). Eventually, 29

112 single-centered RCTs met all inclusion criteria,<sup>[8-10, 15-40]</sup> as shown in the flow diagram (Locate Figure  
 113 1)

114 **Figure 1** | Flow diagram

115 **7.2. Characteristics of the Included Studies**

116 All 29 studies yielded a total of 1,887 patients. The baseline characteristics of each trial are presented  
 117 in Table 1. The control group was treated with cisplatin thoracic perfusion, on the basis of the control  
 118 group, the experimental group was infused with chinese herbal injection. 29 trials reported the ORR  
 119 following WHO guidelines, KPS was reported in 16 studies, and adverse events were reported in 24  
 120 studies, Among the 29 citations, intervention of experimental group was Aidi injection in 12  
 121 studies<sup>[10, 18, 21, 24, 26, 30-32, 35-38]</sup>, Kushen injection in 10 studies<sup>[8, 16, 17, 20, 22, 25, 27, 33, 34, 40]</sup>, Brucea  
 122 Javanica oil emulsion in 3 studies<sup>[9, 29, 39]</sup>, and other injections were not included because less than 3  
 123 studies. A total of 16 studies reported QOL improvement (the number of patients KPS score 10  
 124 points higher or stable after treatment)<sup>[8, 9, 15, 16, 21, 22, 24-27, 29, 33, 34, 36, 37, 39]</sup>. 24 studys that included  
 125 1,527 patients reported adverse reactions<sup>[8, 9, 16-27, 29, 31-39]</sup>. Bone marrow suppression was recorded in  
 126 23 studies<sup>[8, 9, 16-21, 23-27, 29-32, 34-39, 41]</sup>. 19 studys that included 1,353 patients reported chest pain<sup>[9, 15, 16,</sup>  
 127 <sup>18-24, 26, 29, 31-33, 35, 37-39]</sup>.

128 **Table1** Characteristics of the Included Studies

| First author, year | K<br>P<br>S | Years | M/F | E<br>/<br>C | Chinese Herbal Injection | cisplatin (DDP) | Intervention | Outcomes |
|--------------------|-------------|-------|-----|-------------|--------------------------|-----------------|--------------|----------|
|                    |             |       |     |             |                          |                 | time         |          |

---

|        |   |       |      |   |                  |                           |      |       |
|--------|---|-------|------|---|------------------|---------------------------|------|-------|
|        |   |       |      | 3 | Brucea Javanica  |                           |      |       |
| Wang,  | > |       |      | 5 | oil              | 20~30mg/m <sup>2</sup> ,  | 30da | O1,2, |
| HM.20  | 5 | 26~81 | 45/2 | / | emulsion,80~100  | 5~7d/c,4cycle             | y    | 3,4,5 |
| 07     | 0 |       | 5    | 3 | ml,5~7d/c,4cycle | s                         |      |       |
|        |   |       |      | 5 | s                |                           |      |       |
|        |   |       |      | 3 |                  |                           |      |       |
| Hu,JC. | > | 65±15 |      | 6 | Kushenhuangqi    | 40mg/m <sup>2</sup> ,7d/c | 30da | O1,3, |
| 2008   | 5 | /62±1 | 43/2 | / | injection,60ml,7 | ,4cycles                  | y    | 4,5   |
|        | 0 | 7     | 5    | 3 | d/c,4cycles      |                           |      |       |
|        |   |       |      | 5 |                  |                           |      |       |
|        |   |       |      | 2 |                  |                           |      |       |
| Yao,Y  | ≧ |       |      | 3 | Aidi             | 30mg/d,7d/c,              | 28da | O1,2, |
| W.200  | 6 | 38 ~  | 33/1 | / | injection,100ml/ | 4cycles                   | y    | 3,4,5 |
| 8      | 0 | 85    | 3    | 2 | d,7d/c,4cycles   |                           |      |       |
|        |   |       |      | 3 |                  |                           |      |       |
|        |   |       |      | 3 |                  |                           |      |       |
| Li,YP. | - |       |      | 0 | Kushen           | 40mg,7d/c,4c              | 28da | O1,3, |
| 2009   |   | 35~70 | 49/1 | / | injection,20ml,7 | ycles                     | ys   | 4,5   |
|        |   |       | 1    | 3 | d/c,4cycles      |                           |      |       |
|        |   |       |      | 0 |                  |                           |      |       |

---

---

|        |   |       |      |                    |                           |      |       |
|--------|---|-------|------|--------------------|---------------------------|------|-------|
|        |   |       |      | 2 Brucea Javanica  |                           |      |       |
| Zhang, | > |       |      | 7 oil              | 20~30mg/m <sup>2</sup> ,  | 30da | O1,2, |
| SF.200 | 5 | 65~80 | 35/1 | / emulsion,50~100  | 5~7d/c,4cycle             | ys   | 3,4,5 |
| 9      | 0 |       | 5    | 2 ml,5~7d/c,4cycle | s                         |      |       |
|        |   |       |      | 3 s                |                           |      |       |
|        |   |       |      | 2                  |                           |      |       |
| Meng,S | > |       |      | 2 Aidi             | 20~30mg/m <sup>2</sup> ,  | 30da | O1,2, |
| L.2009 | 5 | 58~79 | 28/1 | / injection,50~80  | 7d/c,4cycles              | ys   | 3,4,5 |
|        | 0 |       | 4    | 2 ml,7d/c,4cycles  |                           |      |       |
|        |   |       |      | 0                  |                           |      |       |
|        |   |       |      | 2                  |                           |      |       |
| He,L.2 | - |       |      | 4 Kushen           | 40mg/m <sup>2</sup> ,7d/c | 21da | O1,2, |
| 010    |   | 39~75 | 25/1 | / injection,40ml,7 | ,3cycles                  | ys   | 4     |
|        |   |       | 9    | 2 d/c,3cycles      |                           |      |       |
|        |   |       |      | 0                  |                           |      |       |
|        |   |       |      | 3                  |                           |      |       |
| Wang,  |   |       |      | 0 Aidi             | 40mg,7d/c,4c              | 28da |       |
| XH.20  | - |       |      | / injection,50ml,7 | ycles                     | ys   | O1,4  |
| 10     |   | 20~69 | 47/1 | 3 d/c,4cycles      |                           |      |       |
|        |   |       | 3    |                    |                           |      |       |
|        |   |       |      | 0                  |                           |      |       |

---



---

|        |   |       |      |                    |                          |      |       |
|--------|---|-------|------|--------------------|--------------------------|------|-------|
|        |   |       |      | 2                  |                          |      |       |
|        |   |       |      | 8 Kushen           |                          |      |       |
| Han,Z  | > |       | 35/2 |                    | 20~40mg,7d/              | 28da | O1,2, |
|        | 5 | 41~91 |      | / injection,20mg,7 |                          |      |       |
| Q.2012 |   |       | 1    |                    | c,2~4cycles              | ys   | 3,4,5 |
|        | 0 |       |      | 2 d/c,2~4cycles    |                          |      |       |
|        |   |       |      | 8                  |                          |      |       |
|        |   |       |      | 2                  |                          |      |       |
|        |   |       |      | 1 Aidi             |                          |      |       |
| Sun,SL | > |       | 27/1 |                    | 20~30mg/m <sup>2</sup> , | 28da | O1,2, |
|        | 5 | 43~74 |      | / injection,50~80  |                          |      |       |
| .2012  |   |       | 3    |                    | 7d/c,4cycles             | ys   | 3,4,5 |
|        | 0 |       |      | 1 ml,7d/c,4cycles  |                          |      |       |
|        |   |       |      | 9                  |                          |      |       |
|        |   |       |      | 5                  |                          |      |       |
|        |   |       |      | 6 Aidi             |                          |      |       |
| Liu,CX | > |       | 57/5 |                    | 30mg,7d/c,4c             | 28da | O1,2, |
|        | 4 | 41~82 |      | / injection,100ml, |                          |      |       |
| .2013  |   |       | 5    |                    | ycles                    | ys   | 3,4,5 |
|        | 0 |       |      | 5 7d/c,4cycles     |                          |      |       |
|        |   |       |      | 6                  |                          |      |       |
|        |   |       |      | 3                  |                          |      |       |
|        |   |       |      | 2 Aidi             |                          |      |       |
| Wang,  |   |       | 46/1 |                    | 60mg,7d/c,4c             | 28da | O1,3, |
| XC.201 | - | 29~83 |      | / injection,40ml,7 |                          |      |       |
|        |   |       | 8    |                    | ycles                    | ys   | 4,5   |
| 4      |   |       |      | 3 d/c,4cycles      |                          |      |       |
|        |   |       |      | 2                  |                          |      |       |

---

---

|         |   |       |      |                     |              |      |       |
|---------|---|-------|------|---------------------|--------------|------|-------|
|         |   |       |      | 4                   |              |      |       |
| Liu,D.2 | > | 60.2± | 48/4 | 6 Kushen            | 40 ~         |      |       |
| 015     | 6 | 8.2   | 0    | / injection,20ml,7  | 60mg,7d/c,3c | 30da | O1,2, |
|         | 0 |       |      | 4 d/c,3cycles       | ycles        | y    | 3,5   |
|         |   |       |      | 2                   |              |      |       |
|         |   |       |      | 2                   |              |      |       |
| Yang,D  | > |       | 33/1 | 5 Aidi              | 25mg/d,7d/c, | 35da | O1,2, |
| F.2015  | 4 | 41~76 | 7    | / injection,75ml/d, | 5cycles      | ys   | 3,4   |
|         | 5 |       |      | 2 7d/c,5cycles      |              |      |       |
|         |   |       |      | 5                   |              |      |       |
|         |   |       |      | 3                   |              |      |       |
| Wang,   |   | 64.5± | 44/2 | 5 Kushenhuangqi     | 40mg/m2,5~7  | 28da |       |
| HX.20   | - | 8.7   | 6    | / injection,60ml,5  | d/c,4cycles  | ys   | O1    |
| 16      |   |       |      | 3 ~7d/c,4cycles     |              |      |       |
|         |   |       |      | 5                   |              |      |       |
|         |   |       |      | 3                   |              |      |       |
| Liu,L.2 | ≧ | 32~76 | -    | 0 Kushen            | 40mg,7d/c,4c | 28da | O1,2, |
| 017     | 5 |       |      | / injection,20ml,7  | ycles        | ys   | 3,4   |
|         | 0 |       |      | 3 d/c,4cycles       |              |      |       |
|         |   |       |      | 0                   |              |      |       |

---

---

|        |         |       |      |                    |                          |      |       |
|--------|---------|-------|------|--------------------|--------------------------|------|-------|
|        |         |       | 3    |                    |                          |      |       |
| Liu,SY | >       |       | 2    | Huachansu          |                          |      |       |
| .2017  | 6       | 33~78 | 35/2 | / injection,20ml,7 | 40mg,7d/c,2c             | 30da | O1,3, |
|        | 0       |       | 9    | 3 d/c,2cycles      | ycles                    | ys   | 4,5   |
|        |         |       | 2    |                    |                          |      |       |
|        |         |       | 4    | Brucea Javanica    |                          |      |       |
| Shen,S | $\cong$ |       | 0    | oil                | 50mg/m <sup>2</sup> /d,7 | 28da | O1,2, |
| L.2017 | 6       | 48~70 | 52/2 | / emulsion,50ml,7  | d/c,4cycles              | ys   | 3,4,5 |
|        | 0       |       | 8    | 4 d/c,4cycles      |                          |      |       |
|        |         |       | 0    |                    |                          |      |       |
|        |         |       | 3    |                    |                          |      |       |
| Shi,WJ | $\cong$ |       | 0    | Kushen             |                          |      |       |
| .2017  | 5       | 34 ~  | 39/2 | / injection,20ml,7 | 40mg,7d/c,4c             | 28da | O1,2, |
|        | 0       | 78    | 1    | 3 d/c,4cycles      | ycles                    | ys   | 3,4   |
|        |         |       | 0    |                    |                          |      |       |
|        |         |       | 4    |                    |                          |      |       |
| Hou,TJ | >       |       | 5    | Aidi               |                          |      |       |
| ,2017  | 4       | 18~80 | 52/3 | / injection,100ml, | 30mg,7d/c,4c             | 28da | O1,3, |
|        | 5       |       | 8    | 4 7d/c,4cycles     | ycles                    | ys   | 4,5   |
|        |         |       | 5    |                    |                          |      |       |

---

---

|        |      |      |                    |                          |      |       |
|--------|------|------|--------------------|--------------------------|------|-------|
|        |      |      | 1                  |                          |      |       |
| Shi,WL | 30 ~ | 20/1 | 5 Aidi             | 60mg,7d/c,4c             | 28da | O1    |
| .2017  | -    | 0    | / injection,40ml,7 | ycles                    | ys   |       |
|        | 80   |      | 1 d/c,4cycles      |                          |      |       |
|        |      |      | 5                  |                          |      |       |
|        |      |      | 3                  |                          |      |       |
| Wang,  | 44 ~ | 45/1 | 2 Aidi             | 20~30mg/m <sup>2</sup> , | 28da | O,3,4 |
| Y.2017 | -    | 9    | / injection,50~80  | 7d/c,4cycles             | ys   | ,5    |
|        | 72   |      | 3 ml,7d/c,4cycles  |                          |      |       |
|        |      |      | 2                  |                          |      |       |
|        |      |      | 7                  |                          |      |       |
| Chen,F | 35 ~ | 76/7 | 5 Elemene          | 50mg,1d/c,14             | 14da | O1,2, |
| .2018  | -    | 4    | / injection30mg,1d | cycles                   | y    | 5     |
|        | 67   |      | 7 /c,14cycles      |                          |      |       |
|        |      |      | 5                  |                          |      |       |
|        |      |      | 3                  |                          |      |       |
| Tang,X | 33 ~ | -    | 0 Kushen           | 40mg,3d/c,6c             | 21da | O1,2, |
| Q.2018 | -    | -    | / injection,60ml,3 | ycles                    | ys   | 3,4   |
|        | 77   |      | 3 d/c,6cycles      |                          |      |       |
|        |      |      | 0                  |                          |      |       |

---

|        |   |       |      |                    |                   |               |       |
|--------|---|-------|------|--------------------|-------------------|---------------|-------|
|        |   |       | 2    |                    |                   |               |       |
| Zhu,X. | - | 36~75 | 27/2 | 5 Kushen           | 60mg,7d/c,3c      | 28da          | O1    |
| 2018   |   |       | 3    | / injection,20ml,7 | ycles             | ys            |       |
|        |   |       |      | 2 d/c,3cycles      |                   |               |       |
|        |   |       | 5    |                    |                   |               |       |
|        |   |       | 4    |                    |                   |               |       |
| Wang,  | - | 58~75 | 49/4 | 5 Kushen           | 40 ~              | 21da          | O1,2, |
| Y.2019 |   |       | 1    | / injection,20ml,7 | 60mg,7d/c,3c      | ys            | 3,5   |
|        |   |       |      | 4 d/c,3cycles      | ycles             |               |       |
|        |   |       | 5    |                    |                   |               |       |
|        |   |       | 2    | Kushen             |                   |               |       |
| Wu,CY  | - | 39 ~  | 30/2 | 5                  | injection,40~60   | 40~60mg,7~1   | 30da  |
| .2019  |   | 68    | 0    | /                  | ml,3~7d/c,4cycle  | 4d/c,4cycles  | ys    |
|        |   |       |      | 2                  |                   |               | 3,4   |
|        |   |       |      | s                  |                   |               |       |
|        |   |       | 5    |                    |                   |               |       |
|        |   |       | 1    | Aidi               |                   |               |       |
| Wu,M   | - | 50 ~  | 25/1 | 8                  | injection,50ml/d, | 25mg/d,7d/c,  | 126d  |
| B.2020 |   | 78    | 1    | /                  | 7d/c,12 ~         | 12 ~ 18cycles | ay    |
|        |   |       |      | 1                  |                   |               | 4,5   |
|        |   |       |      | 8                  | 18cycles          |               |       |

---

|         |   |       |        |                 |            |   |       |
|---------|---|-------|--------|-----------------|------------|---|-------|
|         |   | 4     |        |                 |            |   |       |
|         |   |       | 0 Aidi |                 |            |   |       |
| Zeng,J. | - | 43/3  | /      | injection,50~80 | 20~30mg/m2 | - | O1,3, |
| 2021    | - | 54~74 | 7      |                 |            |   | 4,5   |
|         |   |       | 4 ml   |                 |            |   |       |
|         |   |       | 0      |                 |            |   |       |

---

129 **Note:** M/F, male/female; KPS, Karnofsky score; E/C, experimental group/control group; O,  
 130 outcomes; O1, objective response rate (ORR); O2, Quality of Life (QOL); O3, Digestive tract  
 131 reaction; O4, Bone marrow suppression; O5, Chest pain

### 132 7.3. Study quality and Risk of bias

133 Among all studies included, 24 used random assignment<sup>[8-10, 15-17, 19-29, 31, 32, 34-36, 38, 39]</sup>, and seven of  
 134 them reported the way assignments were hidden<sup>[15, 19, 22, 25, 31, 32, 35]</sup>. In terms of blind implementation,  
 135 none of the studies mentioned it. Two of the included studies may have had incomplete data records,  
 136 which have no effect on the results of the study<sup>[20, 40]</sup>, for reasons not explained in the report. In  
 137 terms of selective reporting of outcomes, all studies reported treatment from two or more aspects,  
 138 with a low risk of reporting bias. In terms of other biases, 2 treatment methods of the experimental  
 139 groups were not exclusively described in 2 studies, which may have other biases<sup>[15, 38]</sup>. Figure 2  
 140 shows more details. (LocateFigure2)

141 **Figure 2** | Risk of bias summary and diagram. (A) Risk of bias summary. (B) Risk of bias diagram.

### 142 7.4. Primary outcomes

#### 143 7.4.1 Objective Remission Rate (ORR)

144 Comparing to cisplatin thoracic perfusion, the ORR favored Chinese herbal injection group  
 145 (RR=1.44, 95% CI: 1.35~1.53,  $P = 0.000$ ;  $I^2 = 38.4%$ ,  $P = 0.020$ ). (LocateFigure 3)

146 **Figure 3** | forest plot of ORR

147 **7.5. Secondary outcomes**

148 **7.5.1 Quality of Life (QOL)**

149 Compared with cisplatin thoracic perfusion alone, Chinese herbal injection thoracic perfusion  
150 combined with cisplatin chemotherapy could significantly improve the KPS scores (RR = 1.47,  
151 95%CI: 1.34~1.61,  $P = 0.0000$ ), with low heterogeneity ( $I^2 = 0\%$ ,  $P = 0.943$ ), and there was a  
152 statistical difference between the two groups. (LocateFigure 4)

153 **Figure 4** | Meta-analysis of QOL

154 **7.5.2 Digestive tract reaction**

155 Comparing to cisplatin thoracic perfusion, Chinese herbal injection thoracic perfusion combined with  
156 cisplatin chemotherapy significantly reduced the incidence of digestive tract reactions (RR = 0.56,  
157 95%CI: 0.48~0.67,  $P = 0.000$ ) with low heterogeneity ( $I^2 = 27.5\%$ ,  $P = 0.106$ ). (LocateFigure 5)

158 **Figure 5** | Meta-analysis of digestive tract reaction

159 **7.5.3 Bone marrow suppression**

160 The incidence of bone marrow depressions in experimental group was significantly lower than that in  
161 control group (RR = 0.50, 95% CI: 0.43~0.59,  $P = 0.000$ ) with low heterogeneity ( $I^2 = 8.9\%$ ,  $P =$   
162 0.340). (LocateFigure 6)

163 **Figure 6** | Meta-analysis of bone marrow suppression

164 **7.5.4 Chest pain**

165 The experimental group significantly reduced the incidence of chest pain reactions (RR = 0.65,  
166 95%CI: 0.47~0.89,  $P = 0.007$ ), with low heterogeneity ( $I^2 = 0\%$ ,  $P = 0.631$ ). (LocateFigure 7)

167 **Figure 7** | Meta-analysis of Chest pain

168 **7.6 Subgroup analysis of QOL and Adverse reactions**

169 Among the 5 secondary outcome measures, subgroup analysis was performed according to the  
170 difference of Chinese herbal injections. The results of subgroup analysis are shown in Table 2.

171 Compared with cisplatin thoracic perfusion alone, Aidi injection, Kushen injection, Brucea Javanica  
172 oil emulsion combined with cisplatin thoracic perfusion in the treatment of MPE has a better  
173 therapeutic effect in QOL, digestive tract reaction, and bone marrow suppression outcome, and the  
174 differences are statistically significant, the results of subgroup analysis were consistent with the trend  
175 of the overall combined results. But there was no statistically significant difference in the outcome  
176 index of chest pain, which was different from the overall combined trend. (Table2)

177 **Table 2** results of subgroup analysis

| Outcome                        | Pooled<br>RR(95%CI) | Z    | P     | Heterogeneity      |                |
|--------------------------------|---------------------|------|-------|--------------------|----------------|
|                                |                     |      |       | I <sup>2</sup> (%) | P <sub>h</sub> |
| Quality of<br>Life (QOL)       | 1.52(1.37,1.69)     | 8.05 | 0.000 | 0%                 | 0.998          |
| Digestive<br>tract<br>reaction | 0.53(0.43,0.64)     | 6.37 | 0.000 | 27.9%              | 0.111          |



|                         |                 |      |       |      |       |
|-------------------------|-----------------|------|-------|------|-------|
| Bone marrow suppression | 0.52(0.44,0.61) | 7.60 | 0.000 | 8.6% | 0.346 |
| Chest pain              | 0.82(0.54,1.25) | 0.93 | 0.35  | 0%   | 0.729 |

178 **7.7 Moderator effects**

179 To investigate the sources of potential heterogeneity, we conducted subgroup analysis with  
 180 moderator variables include injection categories, According to the results of subgroup analysis in  
 181 Figure 8, it can be concluded that Aidi injection combined with cisplatin thoracic perfusion  
 182 (RR=1.37, 95%CI: 1.25~1.50,  $P = 0.000$ ,  $I^2 = 58.3%$ ,  $P=0.006$ ), Kushen injection combined with  
 183 cisplatin thoracic perfusion (RR = 1.48, 95%CI: 1.32~1.66,  $P = 0.000$ ,  $I^2 = 0%$ ,  $P=0.813$ ). Brucea  
 184 Javanica oil emulsion combined with cisplatin thoracic perfusion was infused into the chest (RR =  
 185 1.68, 95%CI: 1.34~2.09,  $P = 0.000$ ,  $I^2 = 0%$ ,  $P=0.964$ ). Compared with cisplatin thoracic perfusion  
 186 alone, all of them have more effective rate in the treatment of MPE, and the difference is statistically  
 187 significant. Therefore, the results of the subgroup analysis on ORR, the primary outcome measure,  
 188 were trend consistent with the overall pooled results (RR = 1.45, 95%CI: 1.35~1.55,  $P = 0.000$ ,  $I^2 =$   
 189 45.2%,  $P=0.008$ ). (LocateFigure8)

190 **Figure 8 | Subgroup analysis of ORR**

191 **7.8 Sensitivity analysis**

192 In this study, sensitivity analysis was conducted leave-one-out method, revealing that Hou TJ<sup>[18]</sup> had  
193 a rather great impact on heterogeneity. After the elimination,  $I^2$  decreased from 38.4% to 0%, but had  
194 little effect on the final results (RR=1.44, 95% CI: 1.35~1.53,  $P = 0.000$  vs RR:1.47, 95%CI:  
195 1.37~1.56,  $P = 0.0000$ ). There was a certain heterogeneity in subgroup analysis of ORR ( $I^2 = 45.2\%$ ).  
196 After deleting the study of Hou TJ<sup>[18]</sup>,  $I^2$  decreased from 45.2% to 0%, but had little effect on the  
197 final results (RR = 1.42, 95%CI: 1.30~1.55,  $P = 0.000$  vs RR:1.40, 95%CI: 1.31~1.50,  $P = 0.0000$ ).  
198 (Figure 9A-B). Compared with other research, Hou TJ had a relatively high response rate, so as to  
199 tilting the heterogeneity much heavier. For second outcome: Quality of life (QOL), digestive tract  
200 reaction, bone marrow suppression and chest pain, outcome indicators found that the heterogeneity  
201 among studies was small ( $I^2 < 30\%$ ), and the inclusion of one study by one had little impact on the  
202 results, so these results were stable (LocateFigure 9).

203 **Figure 9** | (A) sensitivity analysis of ORR; (B) sensitivity analysis of Subgroup analysis of ORR; (C)  
204 sensitivity analysis of QOL; (D) sensitivity analysis of digestive tract reaction; (E) sensitivity  
205 analysis of bone marrow suppression; (F) sensitivity analysis of chest pain

## 206 **7.9 Publication bias**

207 Funnel plots were drawn according to the primary outcome measure ORR, we noticed that the  
208 included study was distributed asymmetrically on both sides of the funnel chart (Figures 10A–C),  
209 indicating that there was significant publication bias in the meta-analysis. The Begg ( $p=0.003$ ) and  
210 Egger ( $p=0.000$ ) test was used to test the publication bias of 29 studies included in this meta-analysis,  
211 and the results showed that this study had obvious publication bias ( $P<0.05$ ). The 29 articles included  
212 in this study were analyzed by the trim-fill method, and the results showed that after the inclusion of  
213 14 virtual studies, Meta-analysis was conducted again, using the fixed effect model, and the  
214 combined results of effect indicators RR=1.229, 95%CI :1.171~1.289, although some small sample

215 studies were added to correct the publication bias, which did not have a significant impact on the  
216 results. (LocateFigure10)

217 **Figure 10** | (A) Funnel plot of ORR; (B) Egger test of ORR; (C) Begg test of ORR; (D) trim-fill  
218 method of ORR

## 219 **8 Discussion**

220 The aim of this meta-analysis is to evaluate the efficacy and safety of Chinese herbal injection  
221 thoracic perfusion combined with cisplatin chemotherapy in the treatment of lung cancer MPE.  
222 Compared with the published meta-analysis<sup>[42]</sup>, our study is the first to control the administration  
223 mode of traditional Chinese herbal injection as thoracic perfusion, using thoracic perfusion of  
224 cisplatin as the control group, which ensures the consistency of intervention measures and can reduce  
225 clinical heterogeneity to a certain extent. Our results demonstrated that Chinese herbal injection  
226 thoracic perfusion combined with cisplatin chemotherapy can improve the ORR of lung cancer  
227 patients with MPE (RR=1.44, 95% CI: 1.35~1.53,  $P = 0.000$ ). In addition, we also performed  
228 subgroup analysis according to different Chinese herbal injection. The results showed that compared  
229 with cisplatin thoracic perfusion alone, Aidi injection, Kushen injection and Brucea Javanica oil  
230 emulsion could improve the ORR of lung cancer patients with MPE.

231 As we all know, lung cancer patients with MPE will have symptoms of chest pain due to poor water  
232 circulation. Chemotherapy drugs will inhibit the hematopoietic function of bone marrow, and also  
233 affect the digestive function of patients, with vomiting, diarrhea and other digestive tract reactions,  
234 further affecting the quality of life of patients. In terms of quality of life, our results showed that  
235 Chinese herbal injection could effectively improve the quality of life of patients with lung cancer  
236 MPE, and the results of subgroup analysis were consistent with the total results. In addition, Chinese  
237 herbal injection thoracic perfusion combined with cisplatin chemotherapy can effectively improve the

238 digestive tract reaction and bone marrow suppression of patients, and the results are statistically  
239 significant and consistent with the results of subgroup analysis. Chinese herbal injection thoracic  
240 perfusion combined with cisplatin chemotherapy can alleviate chest pain in patients, but the results of  
241 subgroup analysis showed no statistical significance, which may be related to the small sample size  
242 included in the study. We should consider focusing on this adverse reaction in the future.

243 Although funnel plots for the 29 studys showed that there was significant publication bias in the  
244 meta-analysis, there is no significant difference between the results of trim-fill method and the  
245 original data, which is favorable to our existing results

246 Our study also have certain limitations, which increase the risk of bias in the outcome indicators of  
247 this study. First of all, although this study adopted a relatively extensive search strategy, some  
248 conference papers, supplements and grey literature may not be fully obtained, so potential publication  
249 bias cannot be excluded. The funnel plot and Begg and Egger test results also reflect some potential  
250 publication bias. Among the 29 included studies, only 7 studies described the method of  
251 randomization, while the remaining studies did not explain the method of randomization and  
252 allocation concealment, and no study mentioned the blinding method, which may lead to potential  
253 performance bias and selection bias. Secondly, the sample size of all the included studies was  
254 generally small, and the efficacy of the subjects was not tracked. The intervention measures,  
255 intervention time and drug administration plan of all the studies were not completely unified, and the  
256 forms and effectiveness of the intervention mechanisms could not be clarified. It may increase the  
257 imprecision of the outcome indicators and make the evidence strength of the outcome indicators low.  
258 Finally, important clinical survival outcomes such as overall survival, progression-free survival, and  
259 5-year survival were not fully reported in the included studies. Therefore, high quality and large  
260 sample clinical studies are needed in the future to further evaluate the efficacy and safety of Chinese

261 herbal injection thoracic perfusion combined with cisplatin chemotherapy in the treatment of lung  
262 cancer MPE, and provide more evidence to support our findings.

## 263 **9 Conclusion**

264 Our study demonstrated the potencies of Chinese herbal injection thoracic perfusion combined with  
265 cisplatin chemotherapy to enhance the efficacy and safety for lung cancer MPE patients, improve  
266 quality of life and decrease adverse reactions. Furthermore, the long-term efficacy of Chinese herbal  
267 injection in Lung cancer MPE treatment still needs to be verified in future well-designed clinical  
268 trials that adhere to CONSORT guidelines. More efforts are needed to promote the application of  
269 Chinese herbal injection in the clinic.

## 270 **Acknowledgments**

271 We sincerely thank all support from all authors.

## 272 **Funding Statement**

273 This study was supported by National Natural Science Foundation of China (82174465) .

## 274 **Data Availability**

275 The datasets generated during and/or analysed during the current study are available from the  
276 corresponding author on reasonable request

## 277 **Reference**

- 278 1. Sung H, Ferlay J, Siegel RL, Laversanne M, Soerjomataram I, Jemal A, et al. Global Cancer Statistics  
279 2020: GLOBOCAN Estimates of Incidence and Mortality Worldwide for 36 Cancers in 185 Countries. *CA Cancer*  
280 *J Clin.* 2021;71(3):209-49. Epub 2021/02/05. doi: 10.3322/caac.21660. PubMed PMID: 33538338.
- 281 2. Porcel JM, Gasol A, Bielsa S, Civit C, Light RW, Salud A. Clinical features and survival of lung cancer  
282 patients with pleural effusions. *Respirology.* 2015;20(4):654-9. Epub 2015/02/24. doi: 10.1111/resp.12496.

- 283 PubMed PMID: 25706291.
- 284 3. Ryu JS, Ryu HJ, Lee SN, Memon A, Lee SK, Nam HS, et al. Prognostic impact of minimal pleural  
285 effusion in non-small-cell lung cancer. *J Clin Oncol*. 2014;32(9):960-7. Epub 2014/02/20. doi:  
286 10.1200/jco.2013.50.5453. PubMed PMID: 24550423.
- 287 4. Lerza R, Vannozzi MO, Tolino G, Viale M, Bottino GB, Bogliolo G, et al. Carboplatin and cisplatin  
288 pharmacokinetics after intrapleural combination treatment in patients with malignant pleural effusion. *Ann Oncol*.  
289 1997;8(4):385-91. Epub 1997/04/01. doi: 10.1023/a:1008203100410. PubMed PMID: 9209670.
- 290 5. Sakaguchi H, Ishida H, Nitanda H, Yamazaki N, Kaneko K, Kobayashi K. Pharmacokinetic evaluation  
291 of intrapleural perfusion with hyperthermic chemotherapy using cisplatin in patients with malignant pleural  
292 effusion. *Lung Cancer*. 2017;104:70-4. Epub 2017/02/19. doi: 10.1016/j.lungcan.2016.12.015. PubMed PMID:  
293 28213004.
- 294 6. Xia Y, Fang P, Zhang X, Su G, Shen A. The efficacy of Endostar combined with platinum pleural infusion  
295 for malignant pleural effusion in tumor patients is significantly better than that of monotherapy, but the economy  
296 is lower: a systematic review, network meta-analysis and cost-effectiveness analysis. *Ann Transl Med*.  
297 2022;10(10):604. Epub 2022/06/21. doi: 10.21037/atm-22-2091. PubMed PMID: 35722417; PubMed Central  
298 PMCID: PMCPMC9201148.
- 299 7. Zhong LZ, Xu HY, Zhao ZM, Zhang GM, Lin FW. Comparison of efficacy and toxicity between nedaplatin  
300 and cisplatin in treating malignant pleural effusion. *Onco Targets Ther*. 2018;11:5509-12. Epub 2018/09/21. doi:  
301 10.2147/ott.S168391. PubMed PMID: 30233211; PubMed Central PMCID: PMCPMC6134960.
- 302 8. Liu LZ, SS. Li,GM. Effects and safety of compound Kushen injection combined with cisplatin on  
303 malignant pleural effusion. *J Mod Oncol Mod Oncol Hsien Tai Chung Liu Hsueh*. 2017;25(02):230-3. doi:  
304 10.3969/j.issn.1672-4992.2017.02.018.
- 305 9. Shen S. Clinical Effect of Cisplatin Combined with Brucea Javanica Oil Emulsion in Treating Malignant  
306 Pleural Effusion Caused by Lung Cancer. *Chinese Journal of Clinical Rational Drug Use*. 2017;10(30). doi: 10.  
307 15887 /j. cnki. 13-1389 /r. 2017. 30. 005.
- 308 10. Shi W. Effect of Intrapleural Injection of Addie and Cisplatin in the Treatment of Malignant Pleural  
309 Effusion and Malignant Pleural Effusion. *China Continuing Medical Education*. 2017;9(20):187-9. doi:  
310 10.3969/j.issn.1674-9308.2017.20.100.
- 311 11. Moher D, Shamseer L, Clarke M, Ghersi D, Liberati A, Petticrew M, et al. Preferred reporting items for  
312 systematic review and meta-analysis protocols (PRISMA-P) 2015 statement. *Syst Rev*. 2015;4(1):1. Epub  
313 2015/01/03. doi: 10.1186/2046-4053-4-1. PubMed PMID: 25554246; PubMed Central PMCID:  
314 PMCPMC4320440.
- 315 12. Miller AB, Hoogstraten B, Staquet M, Winkler A. Reporting results of cancer treatment. *Cancer*.  
316 1981;47(1):207-14. Epub 1981/01/01. doi: 10.1002/1097-0142(19810101)47:1<207::aid-  
317 cncr2820470134>3.0.co;2-6. PubMed PMID: 7459811.
- 318 13. Egger M, Davey Smith G, Schneider M, Minder C. Bias in meta-analysis detected by a simple, graphical  
319 test. *Bmj*. 1997;315(7109):629-34. Epub 1997/10/06. doi: 10.1136/bmj.315.7109.629. PubMed PMID: 9310563;  
320 PubMed Central PMCID: PMCPMC2127453.

- 321 14. Higgins JP, Thompson SG, Deeks JJ, Altman DG. Measuring inconsistency in meta-analyses. *Bmj*.  
322 2003;327(7414):557-60. Epub 2003/09/06. doi: 10.1136/bmj.327.7414.557. PubMed PMID: 12958120; PubMed  
323 Central PMCID: PMCPMC192859.
- 324 15. Chen FY, HS. Cheng,D. Li,J. Clinical Efficacy and Prognosis of Kingkong Elemene Liposomal Inection  
325 Combined with Cisplatin for Malignant Pleural Effusion of Lung Cancer. *The Practical Journal of Cancer*.  
326 2018;33(07):1169-71. doi: 10.3969/j.issn.1001-5930.2018.07.036.
- 327 16. Han ZT, MQ. Chen,XP. Shi,F. Effect of Closed Drainage Combined with Compound Kushen Injection  
328 and Cisplatin on Malignant Pleural Effusion of Lung Cancer. *Zhejiang Journal of Integrated Traditional Chinese  
329 and Western Medicine*. 2012;22(07):524-6. doi: 10.3969/j.issn.1005-4561.2012.07.011.
- 330 17. He L, Chen Z, Wen S, Ren D, Chen H. Compound Kushen Injection as a Local Therapy for Patients  
331 with Advanced Lung CancerAssociated with Malignant Pleural Effusion. *Evaluation and Analysis of Drug-Use in  
332 Hospitals of China*. 2010;10(11):1025-7. doi: 10.14009/j.issn.1672-2124.2010.11.012.
- 333 18. Hou T. Clinical Effect Analysis of Aidi Injection and Cisplatin in the Treatment of Lung Cancer  
334 MalignantPleural Effusion. *Journal of North Pharmacy*. 2017;14(01):178-9. doi: 10.3969/j.issn.1672-  
335 8351.2017.01.152.
- 336 19. Hu JL, QQ. Xie,YS. Intrathoracic administration of Kushenhuangqi Injection combined with cisplatin in  
337 treatment of malignant pleural effusion. *Chinese Journal of General Practitioners*. 2008;7(8). doi:  
338 10.3760/cma.j.issn.1671-7368.2008.08.027.
- 339 20. Li YC, Cp. Li,Qy. Treatment of Lung Cancer Malignant Pleural Effusion with Compound Kushen Injection  
340 Combined with Cisplatin. *China's Naturopathy*. 2009;17(04):42. doi: 10.19621/j.cnki.11-3555/r.2009.04.043.
- 341 21. Liu CP, LY. Zhou,B. The Curative Effect of Addie Injection of Traditional Chinese Medicine combined  
342 with Cisplatin on the Treatment of Lung Cancer with Hydrothorax. *World Chin Med Shih Chieh Chung I Yao*.  
343 2013;8(12):1425-7. doi: 10.3969/j.issn.1673-7202.2013.12.014.
- 344 22. Llu D, LI D. Curative effect and nursing of thoracic cavity drainage and compound kushen injection  
345 combined with cisplatin in the treatment of lung cancer patients companying with malignant pleural effusion. *J  
346 Clin Med Pract Shih Yung Lin Ch'uang I Yao Tsa Chih*. 2015;19(08):21-4. doi: 10.7619/jcmp.201508007.
- 347 23. Liu SM, XJ, Shan B, Li Y, Wang S, Chang N, Fu W. Observation of Clinical Efficacy on Malignant Pleural  
348 Effusion Treated with Cinobufacini Injection and Cisplatin by Intracavitary Perfusion. *Chinese Journal of Coal  
349 Industry Medicine*. 2017;20(07):791-4. doi: 10.11723/mtgyyx 1007-9564 201707010.
- 350 24. Meng S. Clinical Study of Aidi Injection Combined with Cisplatin in the Treatment of Lung Cancer  
351 Malignant Pleural Effusion. *China Practical Medicine*. 2009;4(21):167-8. doi: 10.3969/j.issn.1673-  
352 7555.2009.21.119.
- 353 25. Shi W. Clinical Eficacy and Safety of Compound Matrine Injection Combined with Cisplatin in the  
354 Treatment of Malignant Pleural Effusion Caused by Lung Cancer. *Chinese Journal of Convalescent Medicine*.  
355 2017;26(08):857-9. doi: 10.13517/j.cnki.ccm.2017.08.032.
- 356 26. Sun SL, M. Clinical Study of Aidi injection Combined with Cisplatin in the Treatment of Lung Cancer  
357 Malignant Pleural Effusion. *Mod J Integr Tradit Chin West Med Hsien Tai Chung Hsi I Chieh Ho Tsa Chih*.  
358 2012;21(21):2317-8. doi: 10.3969/j.issn.1008-8849.2012.21.018.



- 359 27. Tang XJ, MH. Li,JP. Luo,BP. Cinical Objective on Sixty Cases of Compound Kushen Injection Combined  
360 withCisplatin in Treatment of Lung Cancer Pleural Effusion. Liaoning Journal of Traditional Chinese Medicine.  
361 2018;45(08):1668-70. doi: 10.13192/j.issn.1000-1719.2018.08.036.
- 362 28. Wang H. Intrathoracic administration of Kushenhuangqi Injection combined with cisplatin in treatment  
363 of malignant pleural effusion. Clinical Research. 2016;24(6).
- 364 29. Wang HL, GQ. Liu,PH. Qu,YM. Xie,GQ. Liu,SX. Brucea Javanica Oil Emulsion Injection Combined with  
365 Chain in the Treatment of Lung Cancer Malignant Pleural Effusion. Mod Chin Med Chung-kuo Hsien Tai Chung  
366 Yao. 2007;9(2). Epub 20131012. doi: 10.3969/j.issn.1673-4890.2007.02.009.
- 367 30. Wang X. Clinical Observation of Aidi Injectio Combined with Cisplatin in the Treatment of Lung Cancer  
368 Malignant Pleural Effusion. China Health Care. 2010;(3). Epub 20101130.
- 369 31. Wang X. Effect of Aidi Injection Combined with Cisplatin on Intrathoracic Perfusion in Patients with Lung  
370 Cancer Complicated with Malignant Pleural Effusion. Contemporary Medical Symposium. 2014;12(19):255-6.  
371 doi: 10.3969/j.issn.2095-7629.2014.19.221.
- 372 32. Wang Y, Yang H. Effect of Aidi Injection Combined with Cisplatin on Lung Cancer Malignant Pleural  
373 Effusion. Psychological Doctor. 2017;23(4):136-7.
- 374 33. Wang YF, SW. Luo,Q. Bai,CF. Li,T. Short-term Effect of Pleural Cavity Drainage and Infusion of  
375 Compound Kushen Injection Combined with Cisplatin in the Treatment of Malignant Pleural Effusion of Lung  
376 Cancer. World Latest Medicine Information. 2019;19(02):116+21. doi: 10.19613/j.cnki.1671-3141.2019.02.075.
- 377 34. Wu CL, J. Wu,XY. Cheng,DW. Clinical study of Compound Radix Sophorae Flavescentis Injection  
378 Combined withCisplatin in Treatment of Malignant Pleural Effusion. Liao-ning Chung I Tsa Chih Liaoning J Tradit  
379 Chin Med. 2019;46(01):85-7. doi: 10.13192/j.issn.1000-1719.2019.01.029.
- 380 35. Wu MC, YC. Xie,JL. Xie,WM. Effect of intrapleural injection of different drugs in the treatment of pleural  
381 effusion in patients with lung cancer. Chinese Community Doctors. 2020;36(12):83+5. doi: 10.13192/j. issn.  
382 1000-1719. 2019. 01. 029.
- 383 36. Yang D. Efficacy Analysis of Cisplatin Chemotherapy Combined with Aidi Injection in the Treatment of  
384 Lung Cancer Malignant Pleural Effusion. The Medical Forum. 2015;19(28):3937-8.
- 385 37. Yao Y, Xu H. Treatment of 23 Cases of Malignant Pleural Effusion with Central Venous Catheter  
386 Drainage Combined with Aidi Injection and Cisplatin. Che-chiang I Hsueh Zhejiang Med J. 2008;(08):884-6. doi:  
387 10.3969/j.issn.1006-2785.2008.08.040.
- 388 38. Zeng JL, SJ. Effect of Chinese Herbal injection Aidi Injection Combined with Cisplatin on Lung Cancer  
389 MalignantPleural Effusion. Special Health. 2021;(12):61-2.
- 390 39. Zhang SC, WL. Meng,SL. Brucea Javanica Oil Emulsion Combined with Chemotherapy Drugs for the  
391 Treatment of Malignant Pleural Effusion in Elderly Patients with Lung Cancer. Mod J Integr Tradit Chin West  
392 Med Hsien Tai Chung Hsi I Chieh Ho Tsa Chih. 2009;18(15):1749-50. doi: 10.3969/j.issn.1008-  
393 8849.2009.15.026.
- 394 40. Zhu X. Short-term Efficacy and Nursing Strategies of Pleural Cavity Drainage and Infusion of Compound  
395 Kushen Injection Combined with Cisplatin in the Treatment of Malignant Pleural Effusion of Lung Cancer.  
396 Electronic Journal of Practical Clinical Nursing Science. 2018;3(30):151+3. doi: 10.3969/j.issn.2096-



397 2479.2018.30.123.

398 41. Wang,XH . Clinical Observation of Aidi Injectio Combined with Cisplatin in the Treatment of Lung Cancer  
399 Malignant Pleural Effusion. China Health Care. 2019;18(3):116-117.

400 42. Xu YF, Chen YR, Bu FL, Huang YB, Sun YX, Li CY, et al. Chinese herbal injections versus intrapleural  
401 cisplatin for lung cancer patients with malignant pleural effusion: A Bayesian network meta-analysis of  
402 randomized controlled trials. Front Oncol. 2022;12:942941. Epub 2022/10/08. doi: 10.3389/fonc.2022.942941.  
403 PubMed PMID: 36203451; PubMed Central PMCID: PMCPMC9531116.

404

405

406

407

408

409

410

411

412

413

414

415

416

417

418

419

420

421

422

423

A

| Author        | Random sequence generation (selection bias) | Allocation concealment (selection bias) | Blinding of participants and personnel (performance bias) | Blinding of outcome assessment (detection bias) | Incomplete outcome data (attrition bias) | Selective reporting (reporting bias) | Other bias |
|---------------|---------------------------------------------|-----------------------------------------|-----------------------------------------------------------|-------------------------------------------------|------------------------------------------|--------------------------------------|------------|
| Chen,F.,2018  | +                                           | ?                                       | ?                                                         | ?                                               | +                                        | +                                    | ?          |
| Han,ZQ,2012   | ?                                           | ?                                       | ?                                                         | ?                                               | +                                        | +                                    | ?          |
| He,L.,2010    | ?                                           | ?                                       | ?                                                         | ?                                               | +                                        | +                                    | ?          |
| Hou,TJ,2017   | ●                                           | ?                                       | ?                                                         | ?                                               | +                                        | +                                    | ?          |
| HuJC,2008     | +                                           | ?                                       | ?                                                         | ?                                               | +                                        | +                                    | ?          |
| L,YP,2009     | ?                                           | ?                                       | ?                                                         | ?                                               | ?                                        | +                                    | ?          |
| Liu,CX,2013   | ?                                           | ?                                       | ?                                                         | ?                                               | +                                        | +                                    | ?          |
| Liu,D,2015    | +                                           | ?                                       | ?                                                         | ?                                               | +                                        | +                                    | ?          |
| Liu,L,2017    | ?                                           | ?                                       | ?                                                         | ?                                               | +                                        | +                                    | ?          |
| Liu,SY,2017   | ?                                           | ?                                       | ?                                                         | ?                                               | +                                        | +                                    | ?          |
| Meng,SL,2009  | ?                                           | ?                                       | ?                                                         | ?                                               | +                                        | +                                    | ?          |
| Shen,SL,2017  | ?                                           | ?                                       | ?                                                         | ?                                               | +                                        | +                                    | ?          |
| Shi,WJ,2017   | +                                           | ?                                       | ?                                                         | ?                                               | +                                        | +                                    | ?          |
| SHI,WL,2017   | ?                                           | ?                                       | ?                                                         | ?                                               | +                                        | +                                    | ?          |
| Sun,SL,2012   | ?                                           | ?                                       | ?                                                         | ?                                               | +                                        | +                                    | ?          |
| Tang,XQ,2018  | ?                                           | ?                                       | ?                                                         | ?                                               | +                                        | +                                    | ?          |
| Wang,HM,2007  | ?                                           | ?                                       | ?                                                         | ?                                               | +                                        | +                                    | ?          |
| Wang,HX,2016  | ?                                           | ?                                       | ?                                                         | ?                                               | +                                        | +                                    | ?          |
| Wang,XC,2014  | +                                           | ?                                       | ?                                                         | ?                                               | +                                        | +                                    | ?          |
| Wang,XH,2010  | ●                                           | ?                                       | ?                                                         | ?                                               | +                                        | +                                    | ?          |
| Wang,Y,2017   | +                                           | ?                                       | ?                                                         | ?                                               | +                                        | +                                    | ?          |
| Wang,Y,2019   | ●                                           | ?                                       | ?                                                         | ?                                               | +                                        | +                                    | ?          |
| Wu,CY,2019    | ?                                           | ?                                       | ?                                                         | ?                                               | +                                        | +                                    | ?          |
| Wu,MB,2020    | +                                           | ?                                       | ?                                                         | ?                                               | +                                        | +                                    | ?          |
| Yang,DF,2015  | ?                                           | ?                                       | ?                                                         | ?                                               | +                                        | +                                    | ?          |
| Yao,YW,2008   | ●                                           | ?                                       | ?                                                         | ?                                               | +                                        | +                                    | ?          |
| ZengJ,2021    | ?                                           | ?                                       | ?                                                         | ?                                               | +                                        | +                                    | ●          |
| Zhang,SF,2009 | ?                                           | ?                                       | ?                                                         | ?                                               | +                                        | +                                    | ?          |
| Zhu,X,2018    | ●                                           | ?                                       | ?                                                         | ?                                               | +                                        | +                                    | ?          |

B

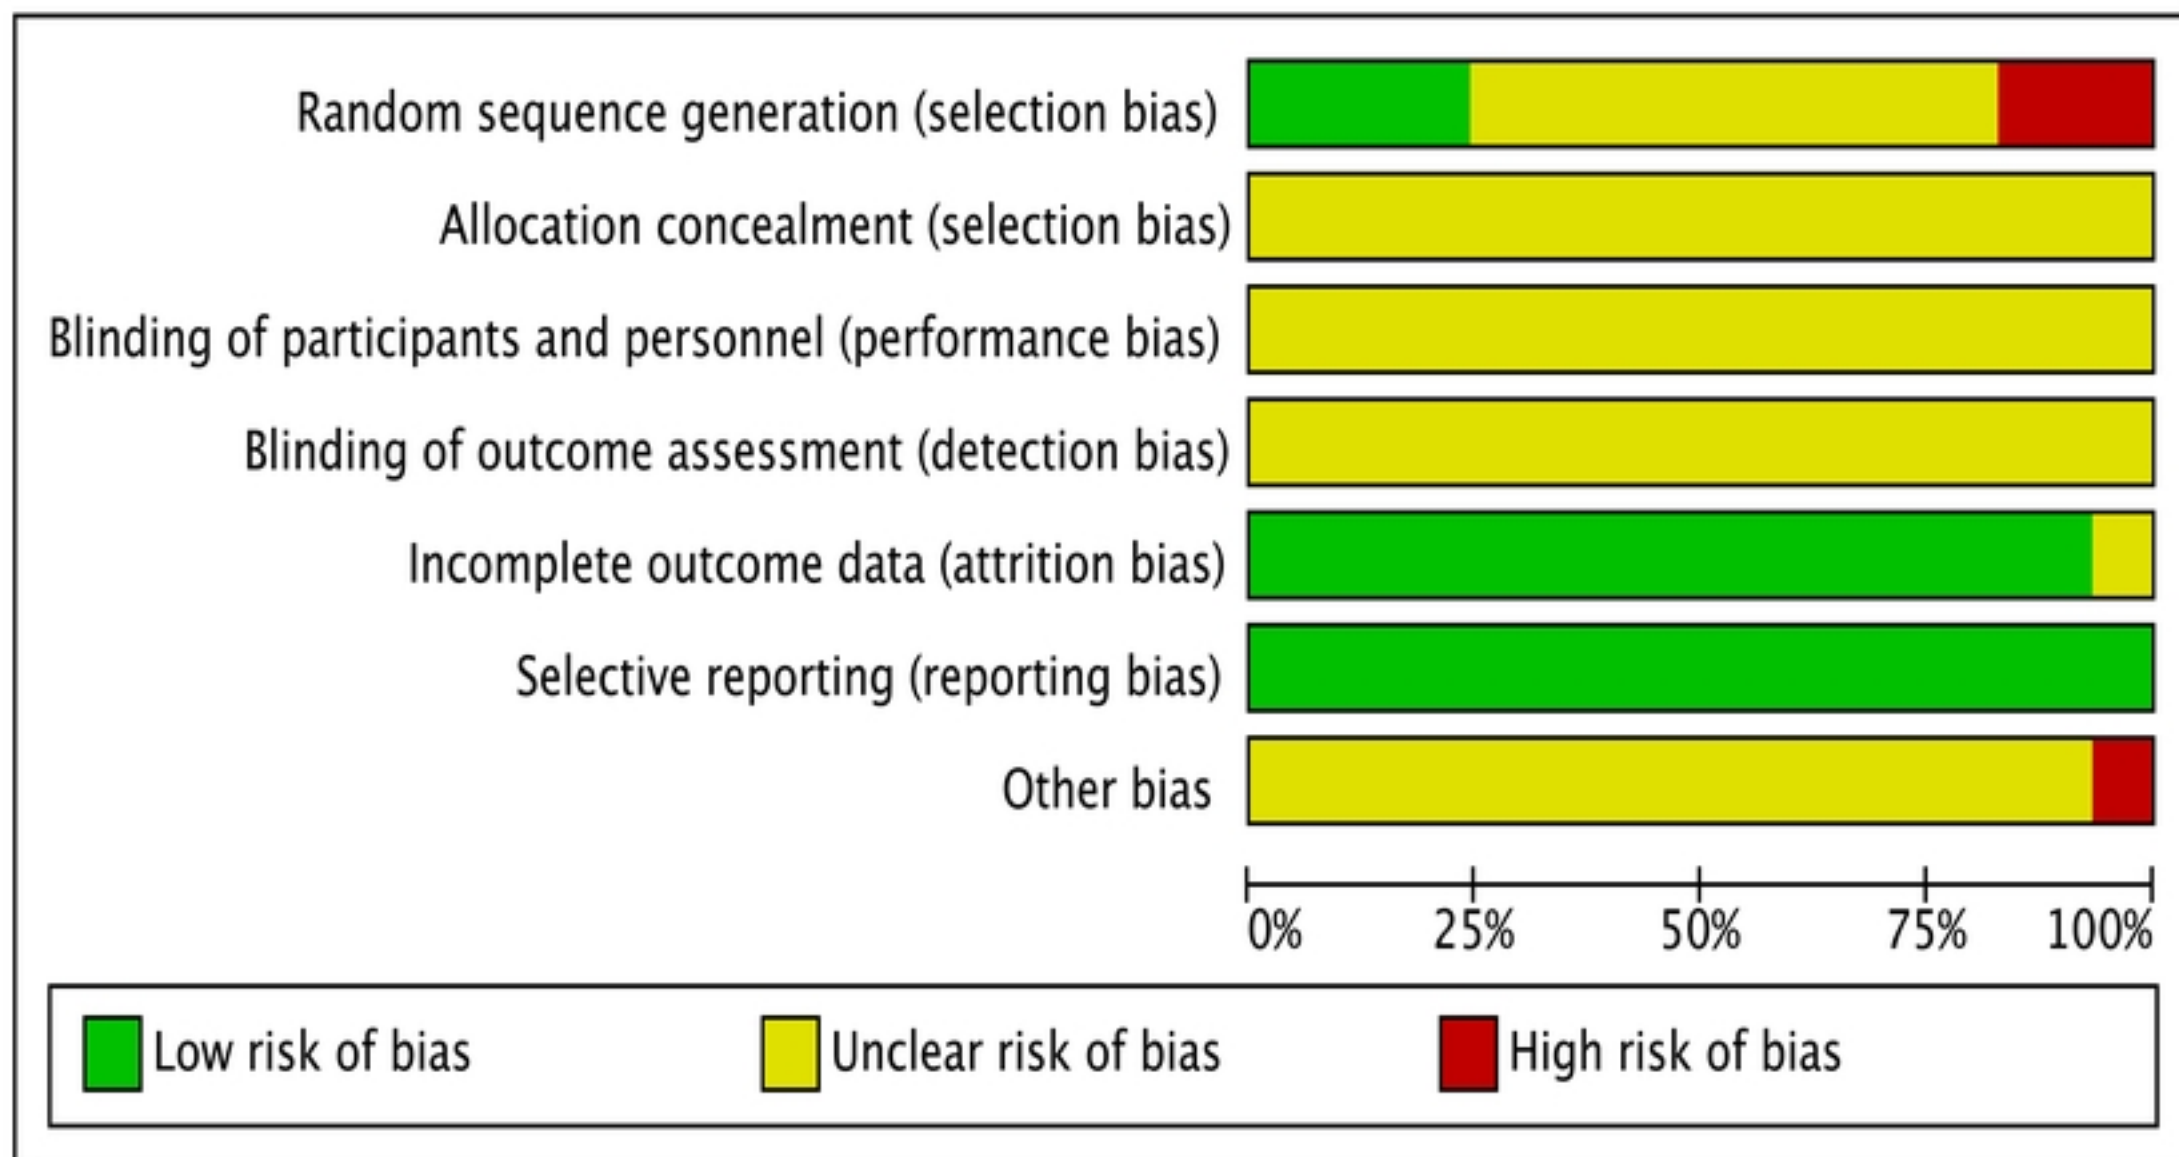

Study ID

RR (95% CI)

% Weight

medRxiv preprint doi: <https://doi.org/10.1101/2022.12.01.22283004>; this version posted December 6, 2022. The copyright holder for this preprint (which was not certified by peer review) is the author/funder, who has granted medRxiv a license to display the preprint in perpetuity. It is made available under a [CC-BY 4.0 International license](https://creativecommons.org/licenses/by/4.0/).

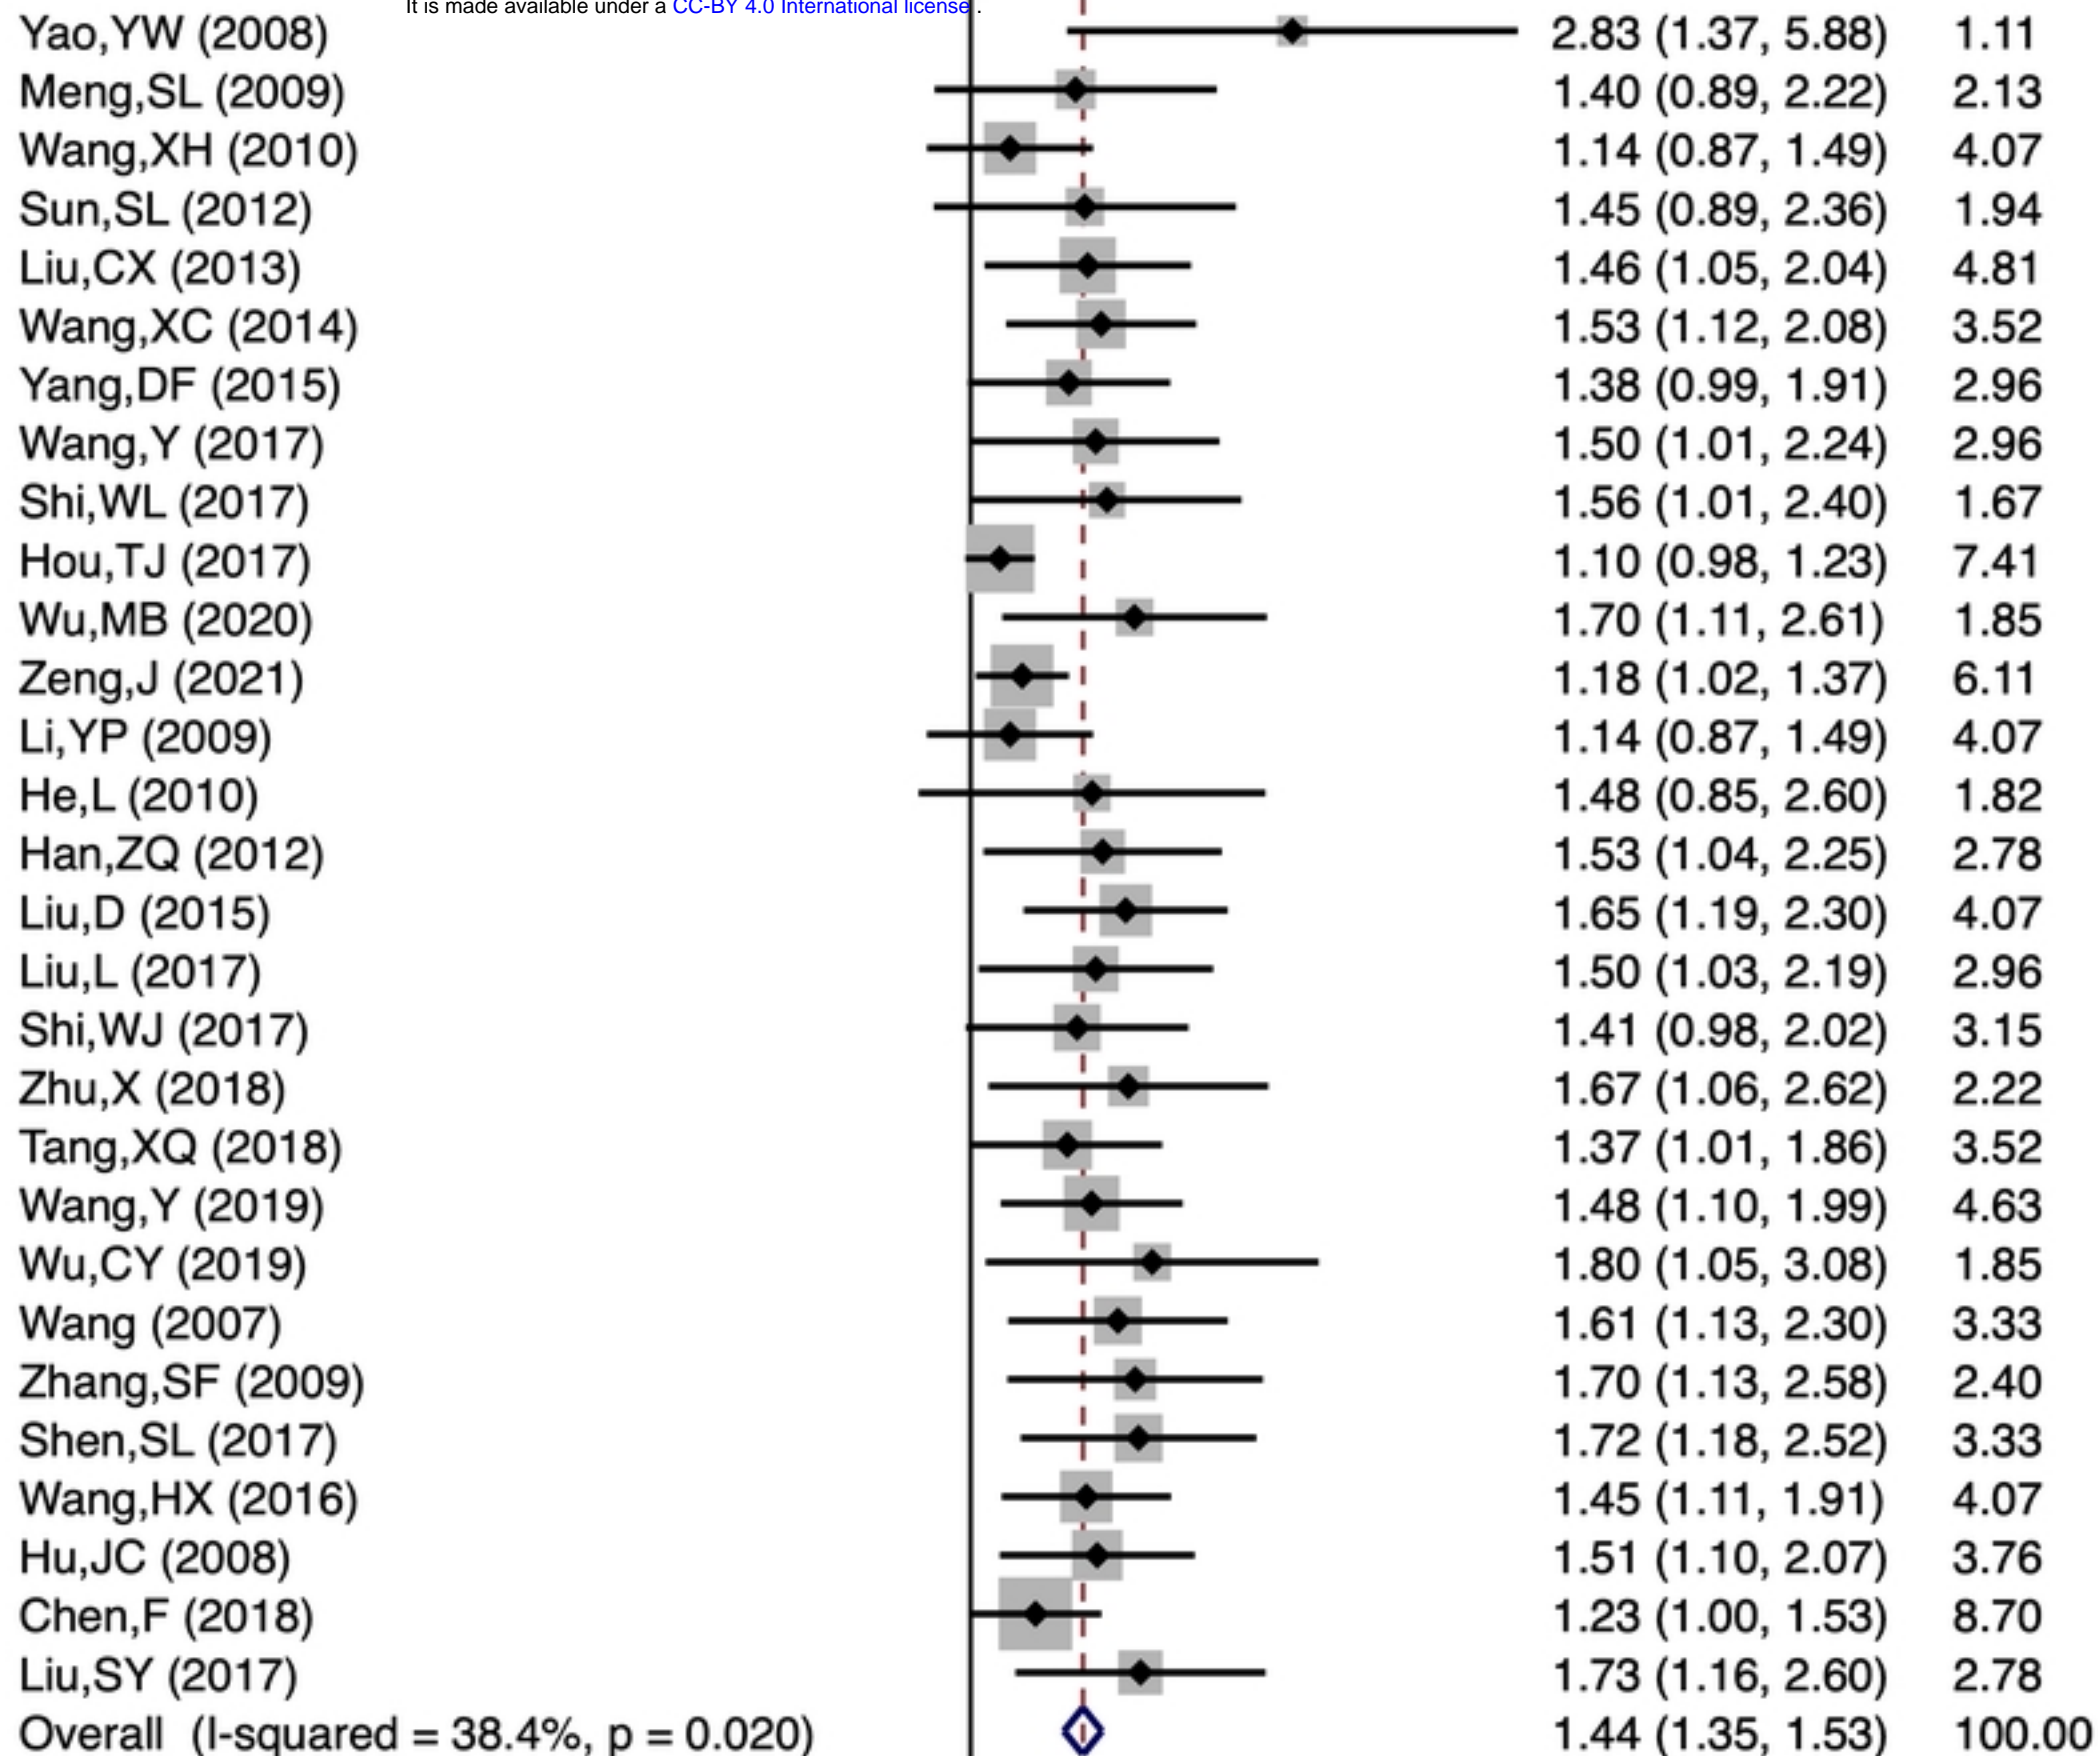

.17

1

5.88

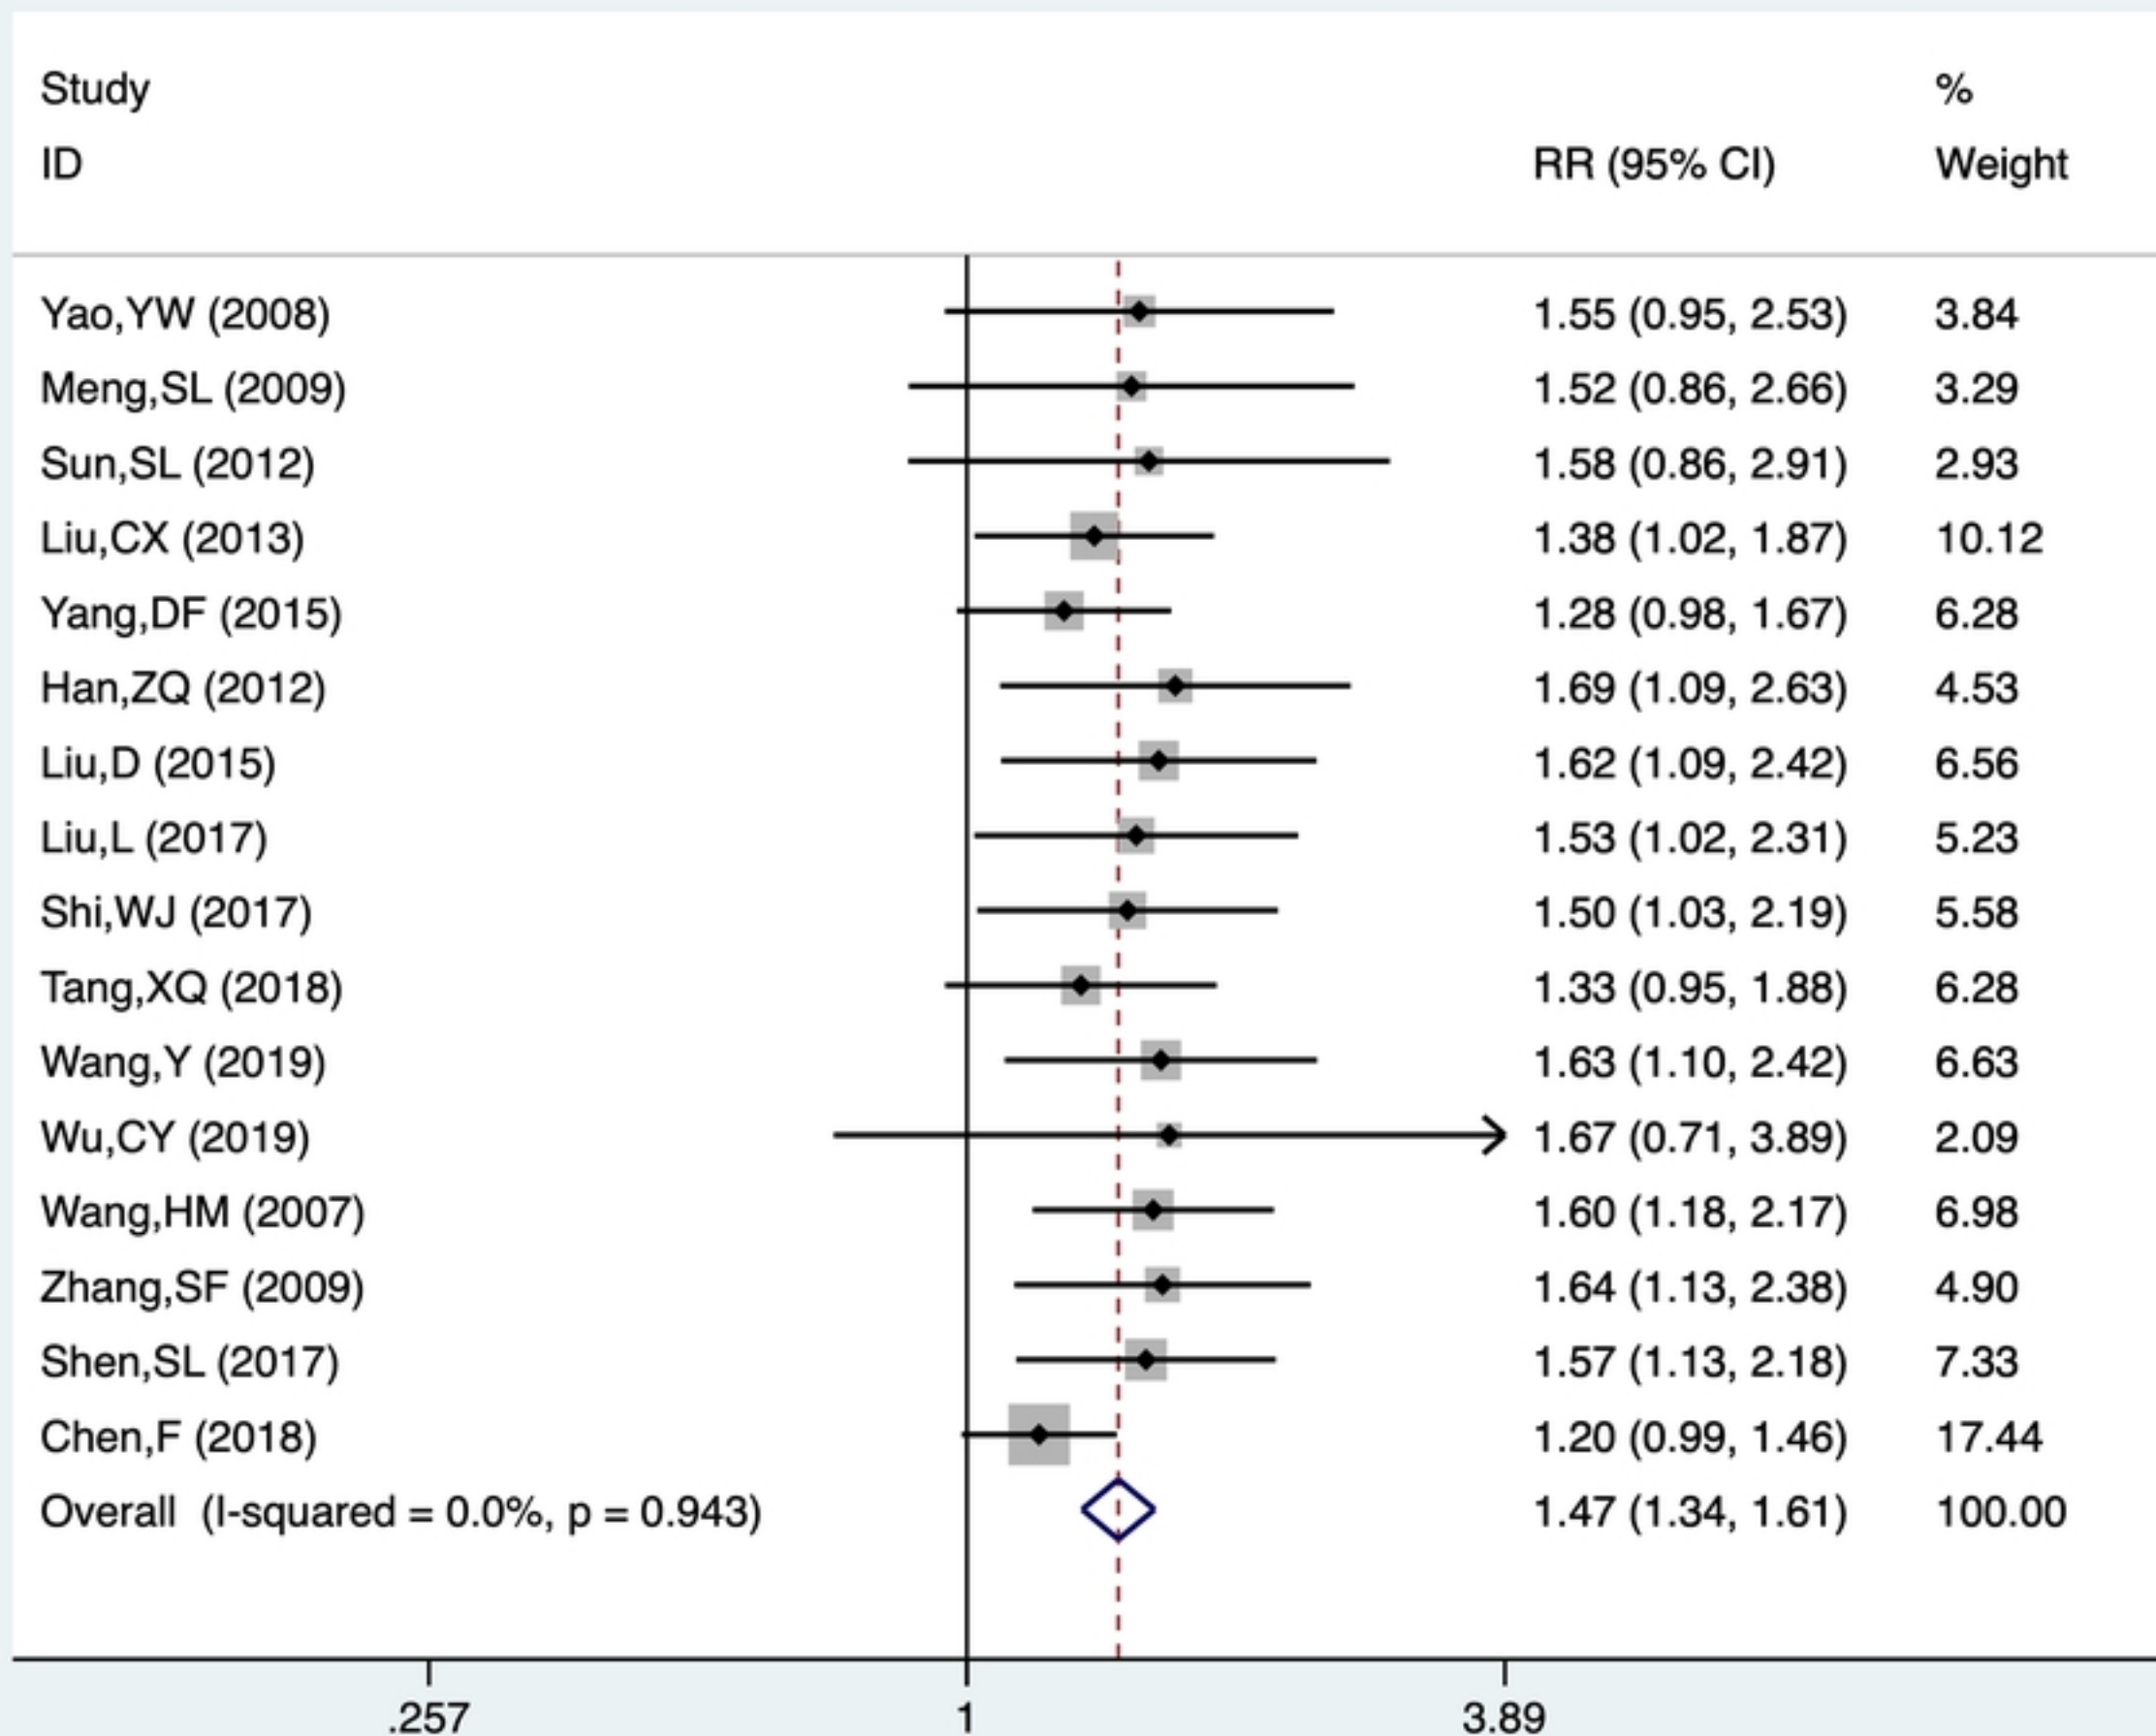



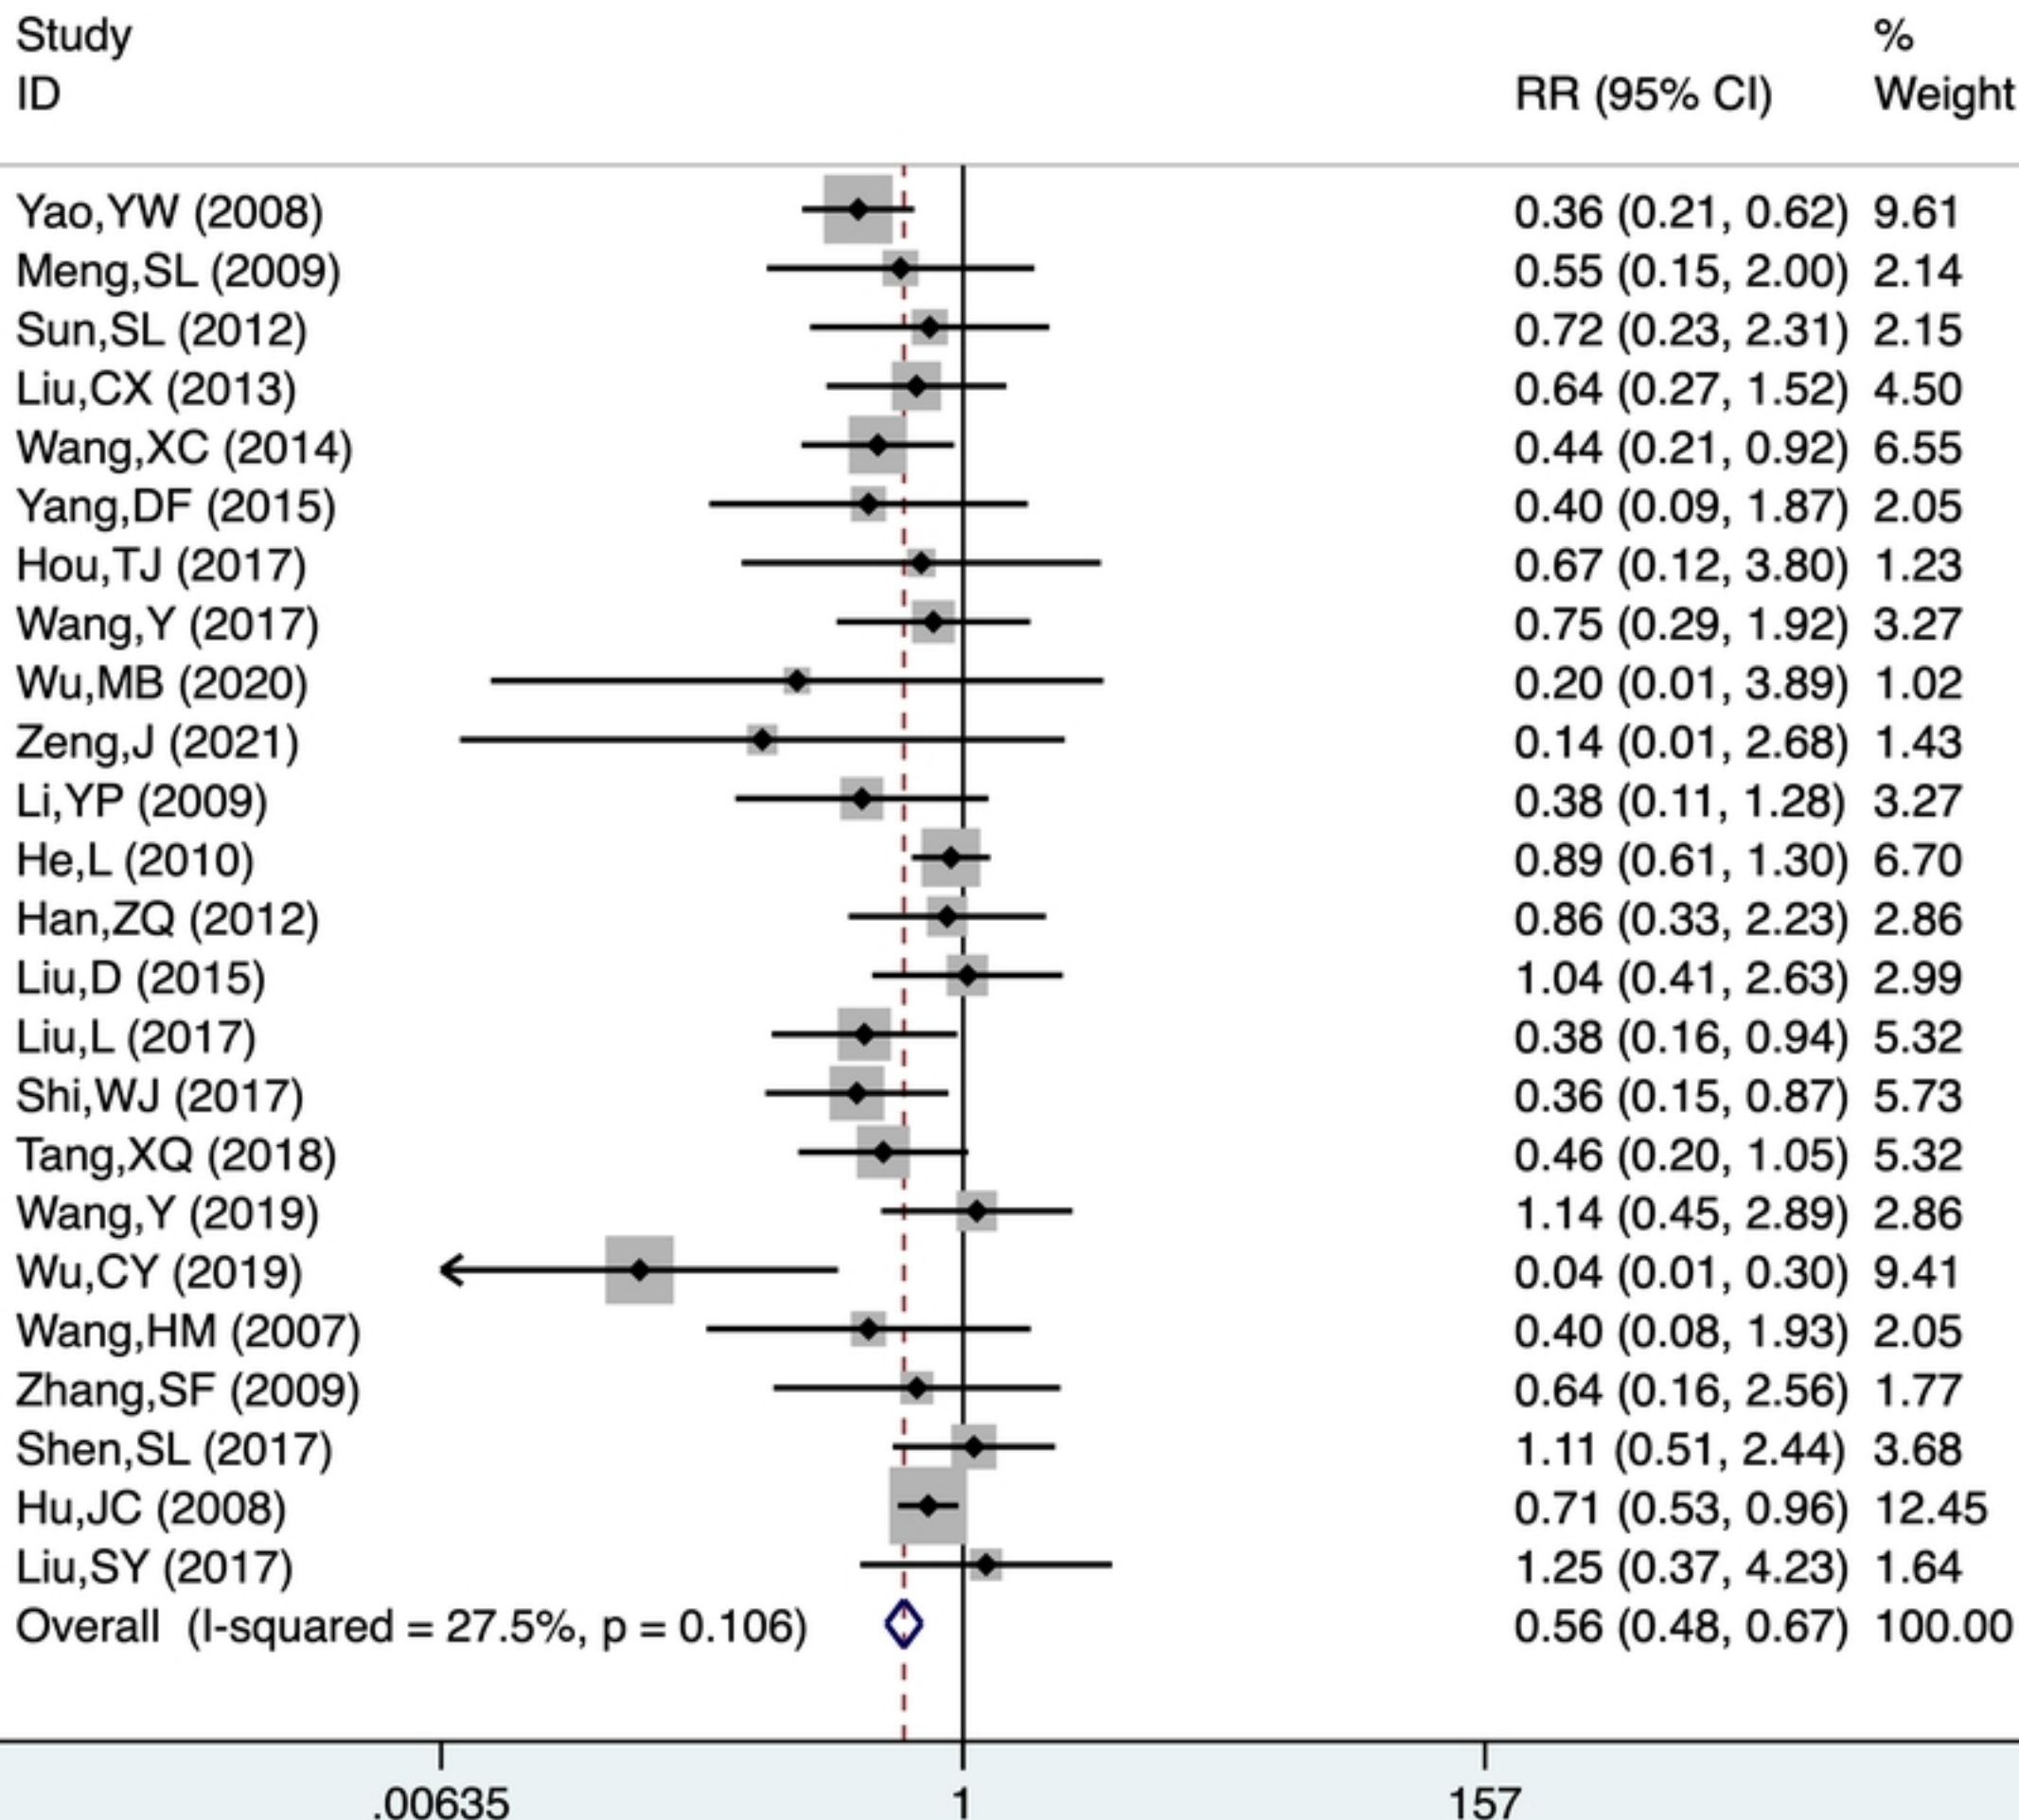

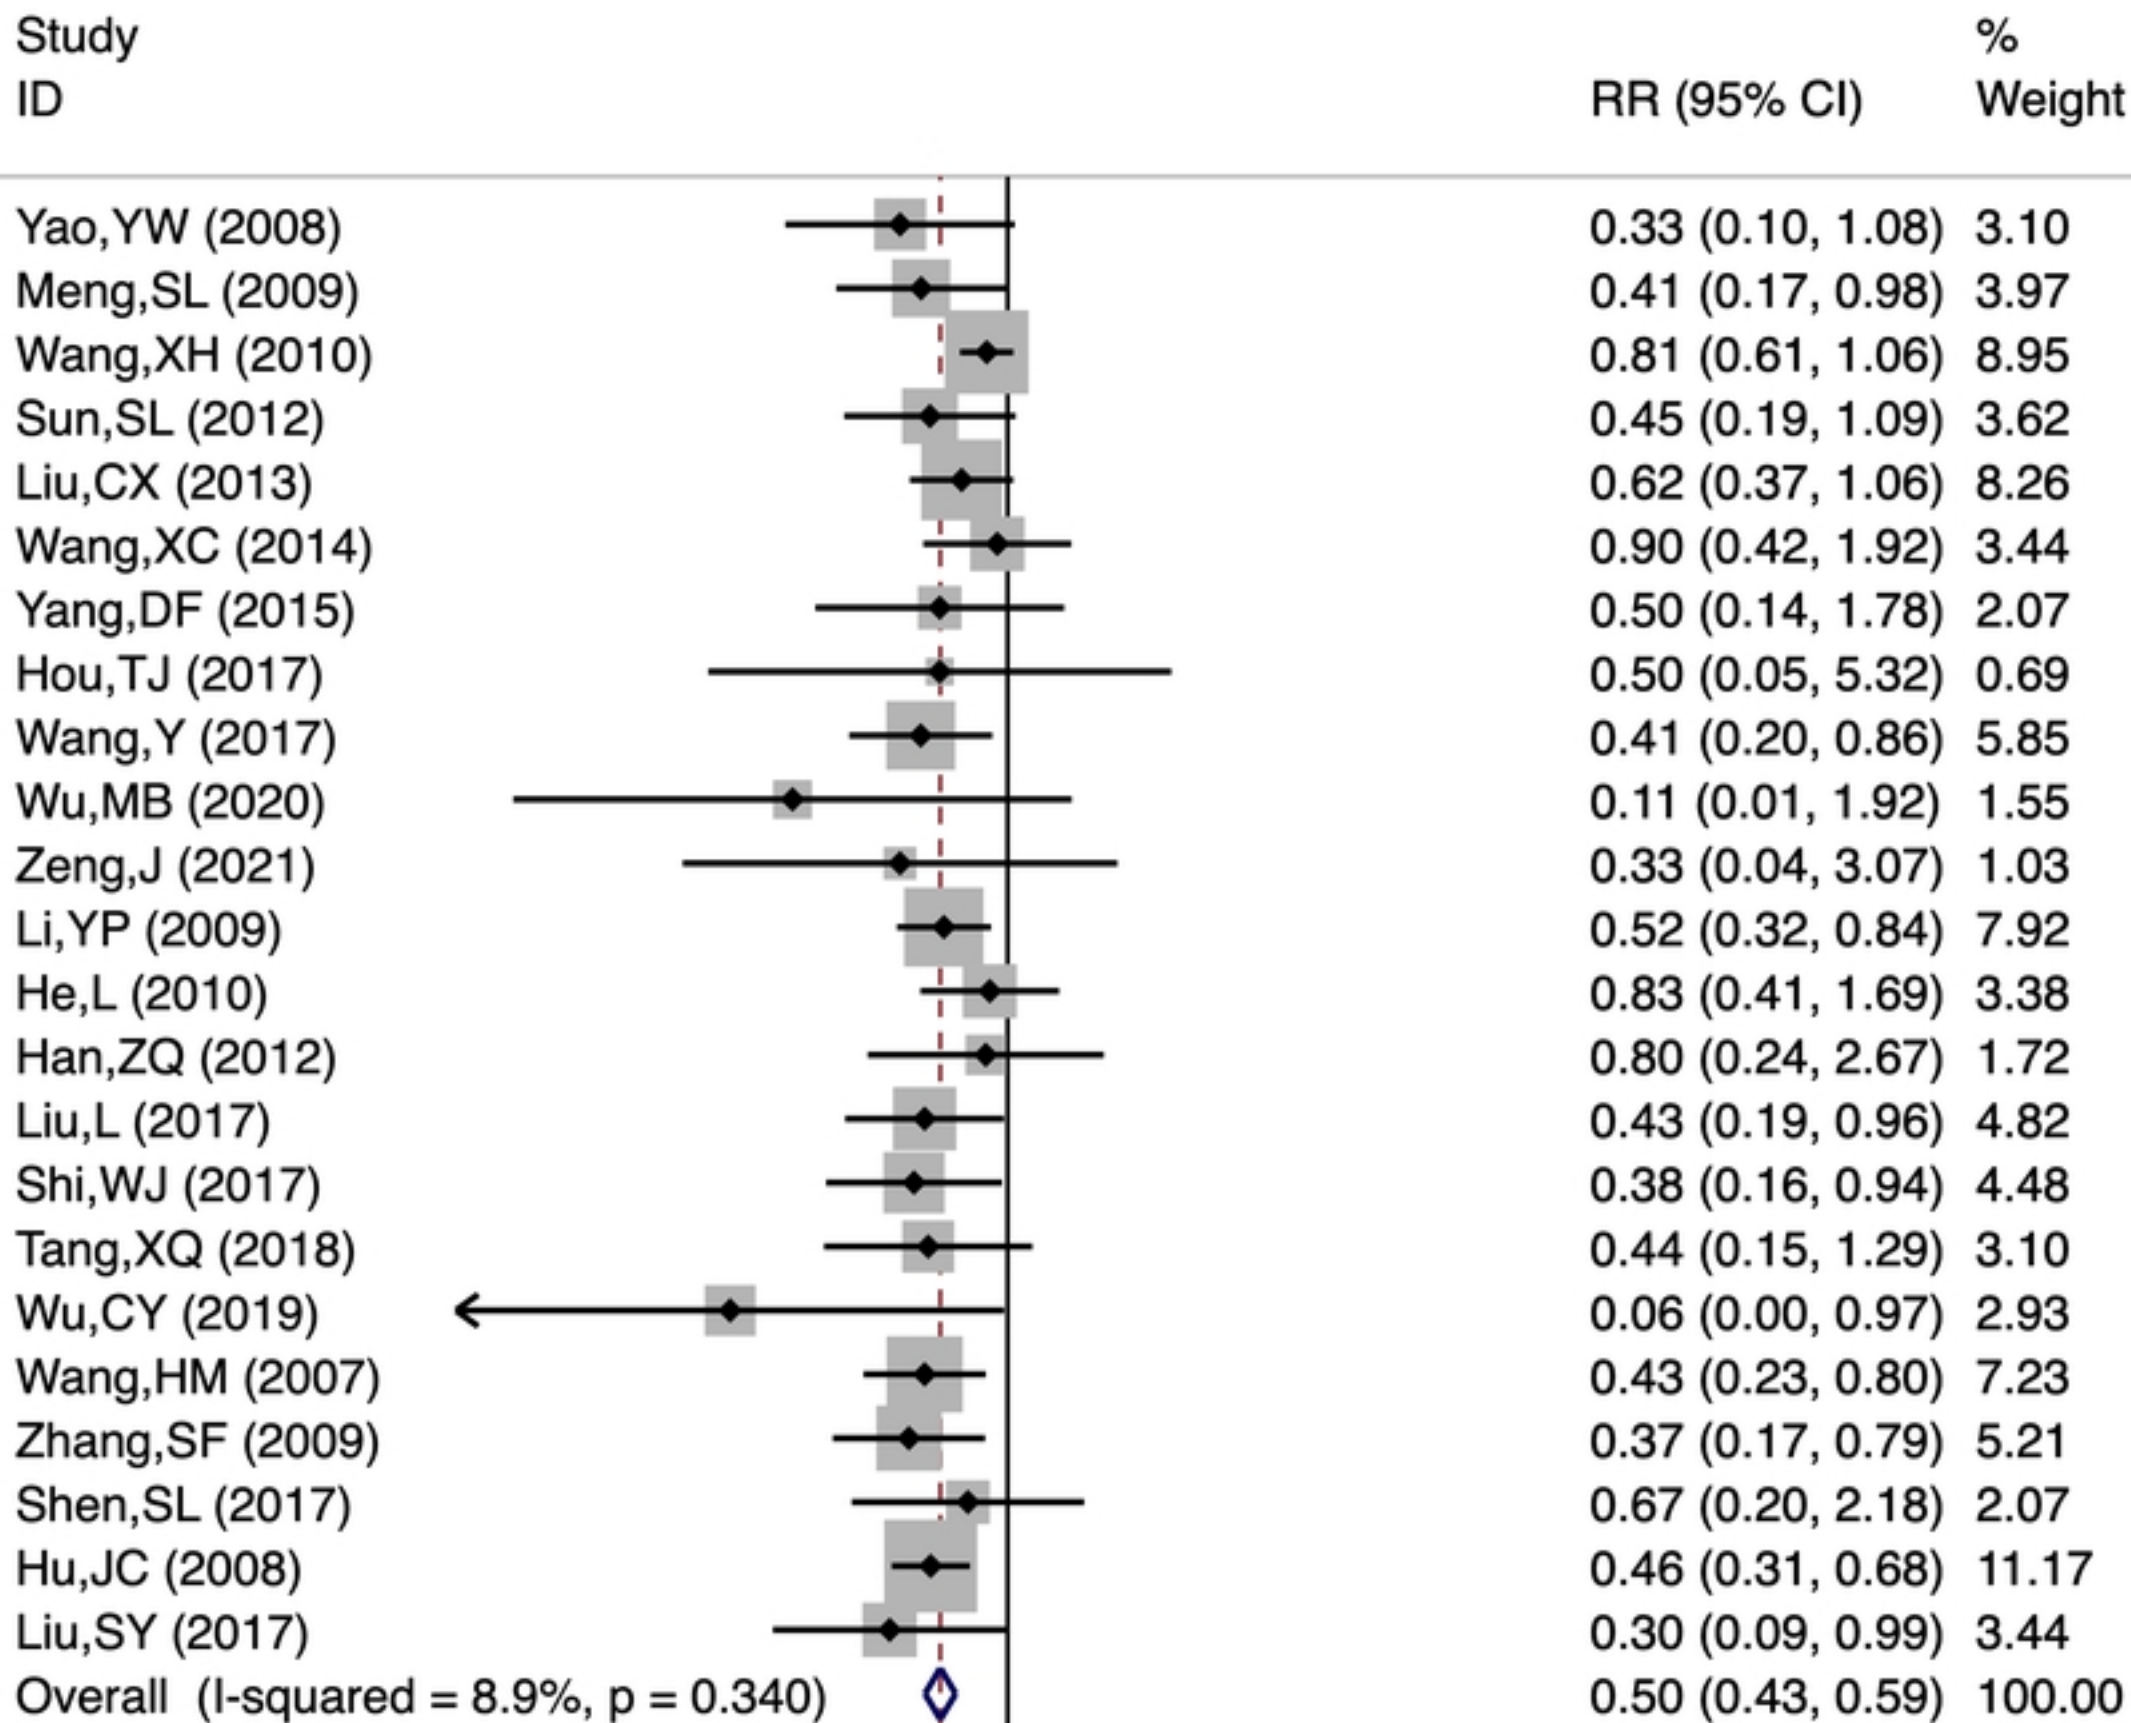

.00358

1

280

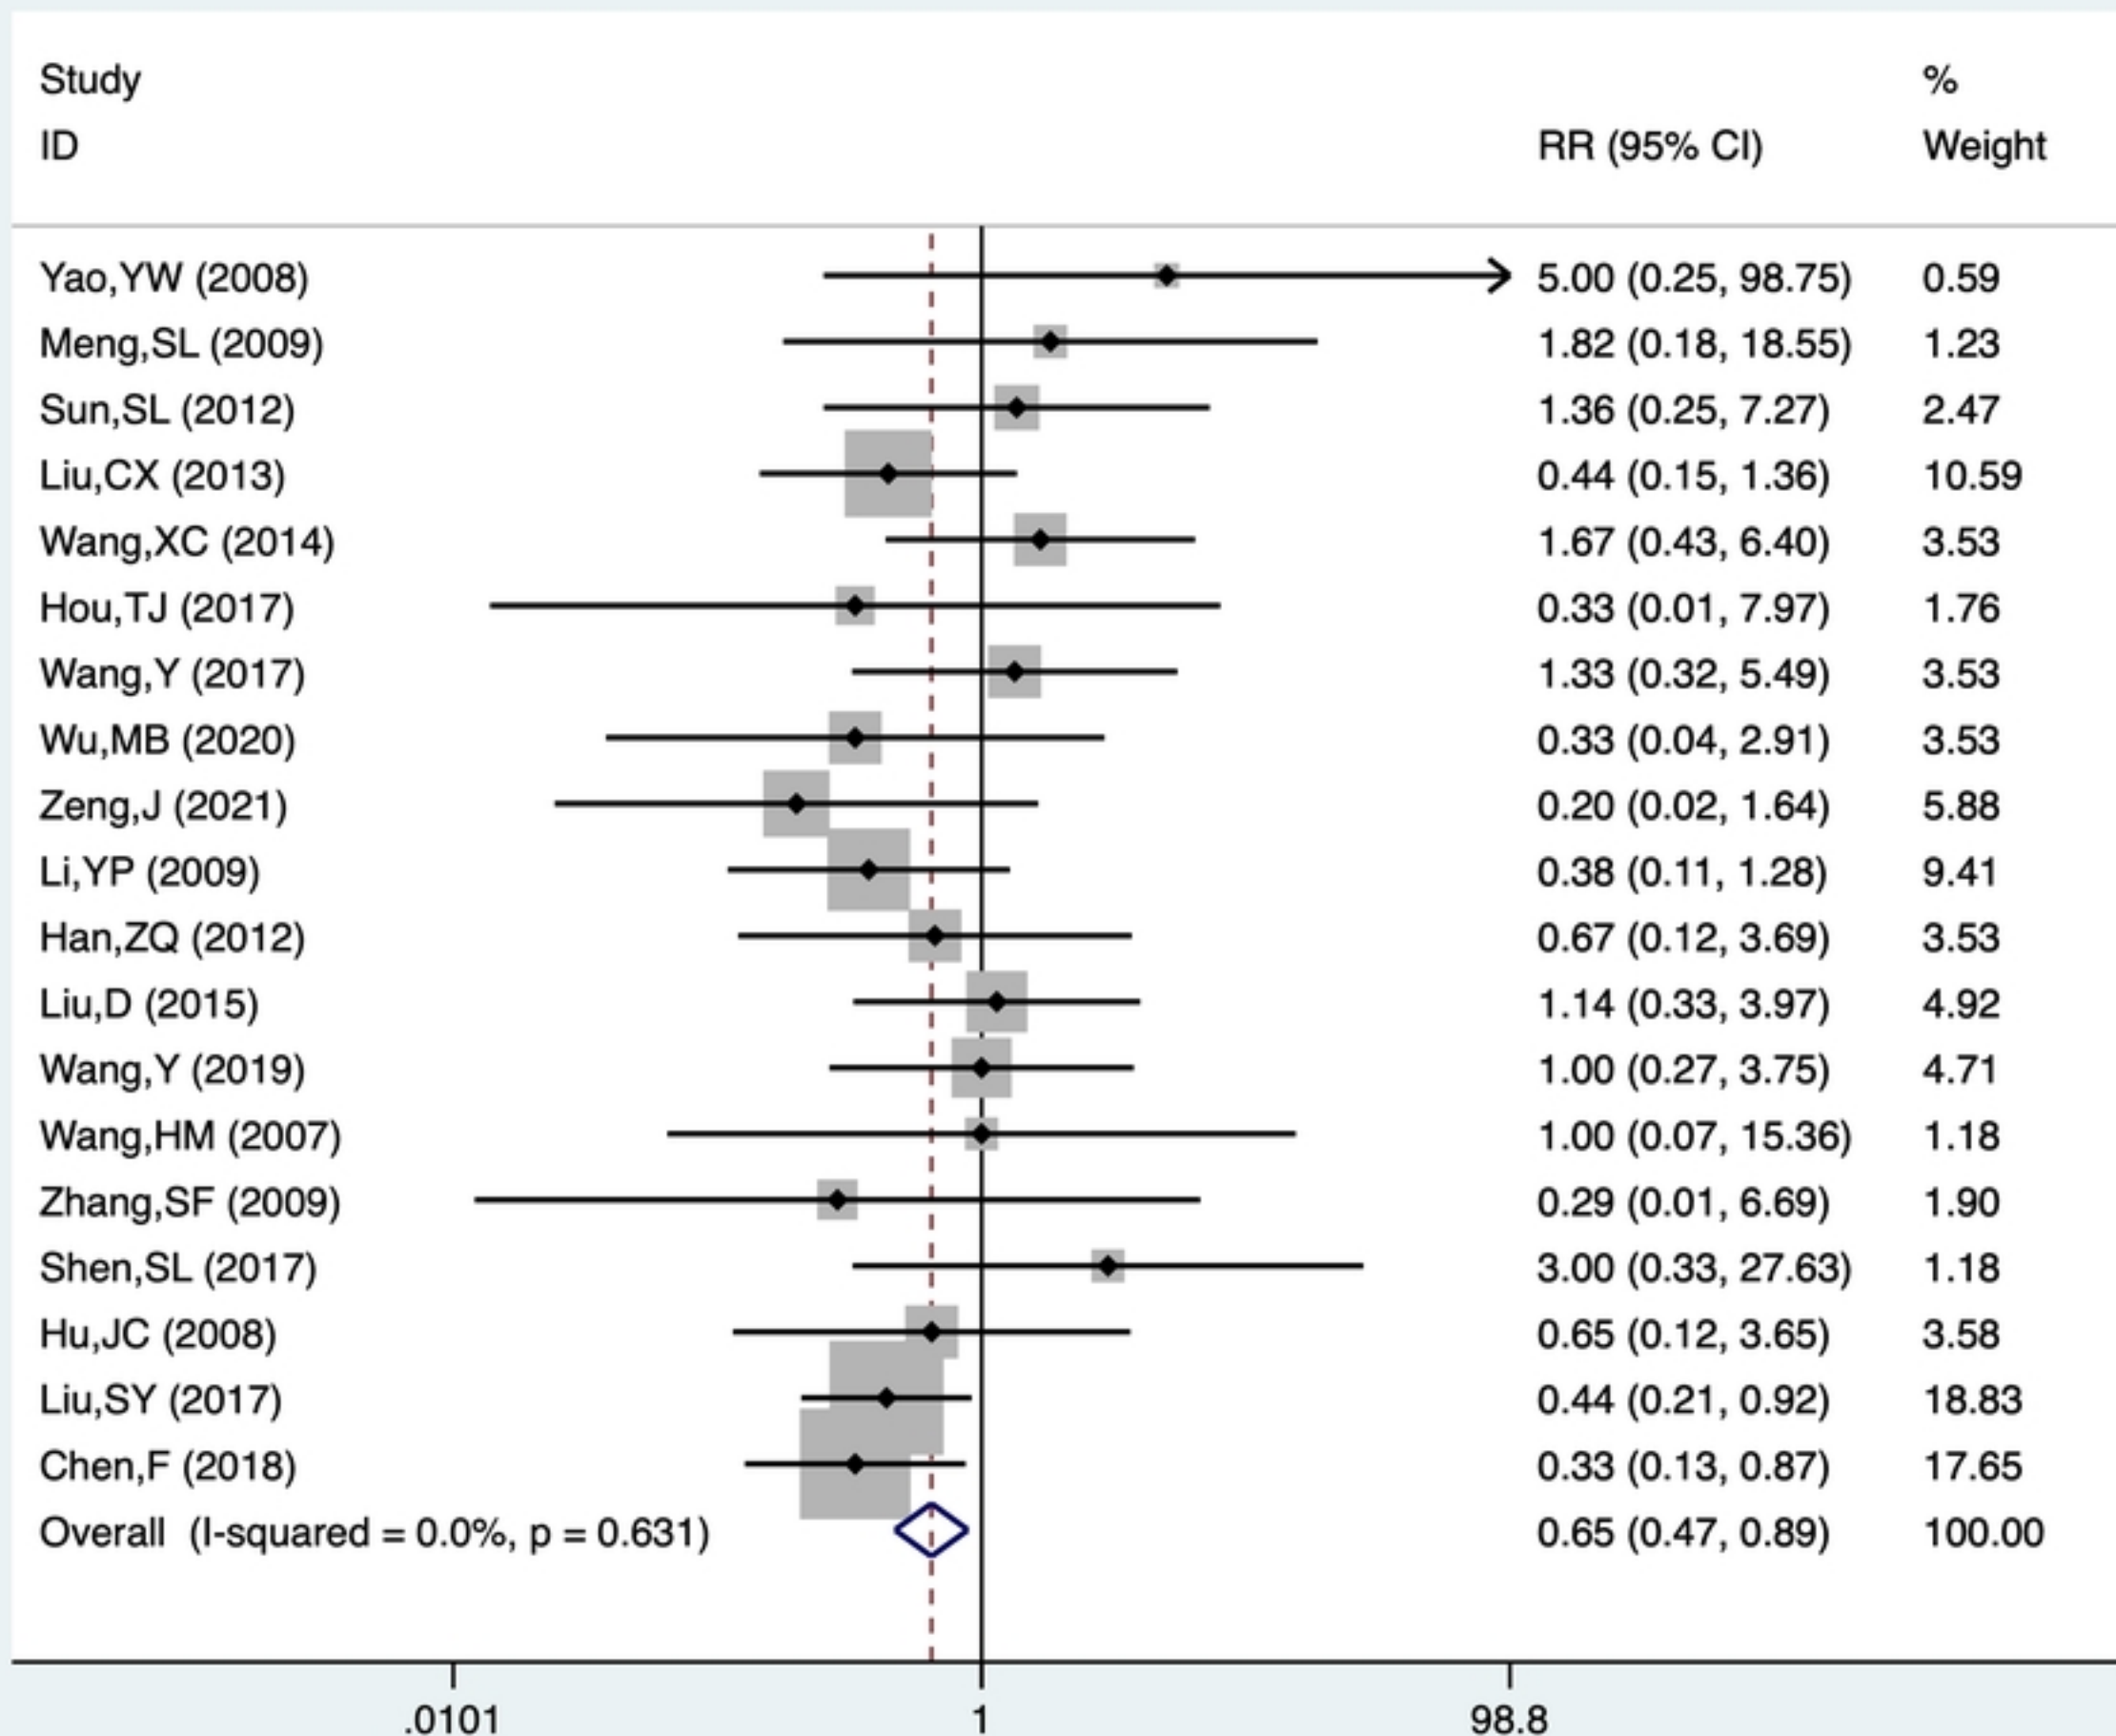



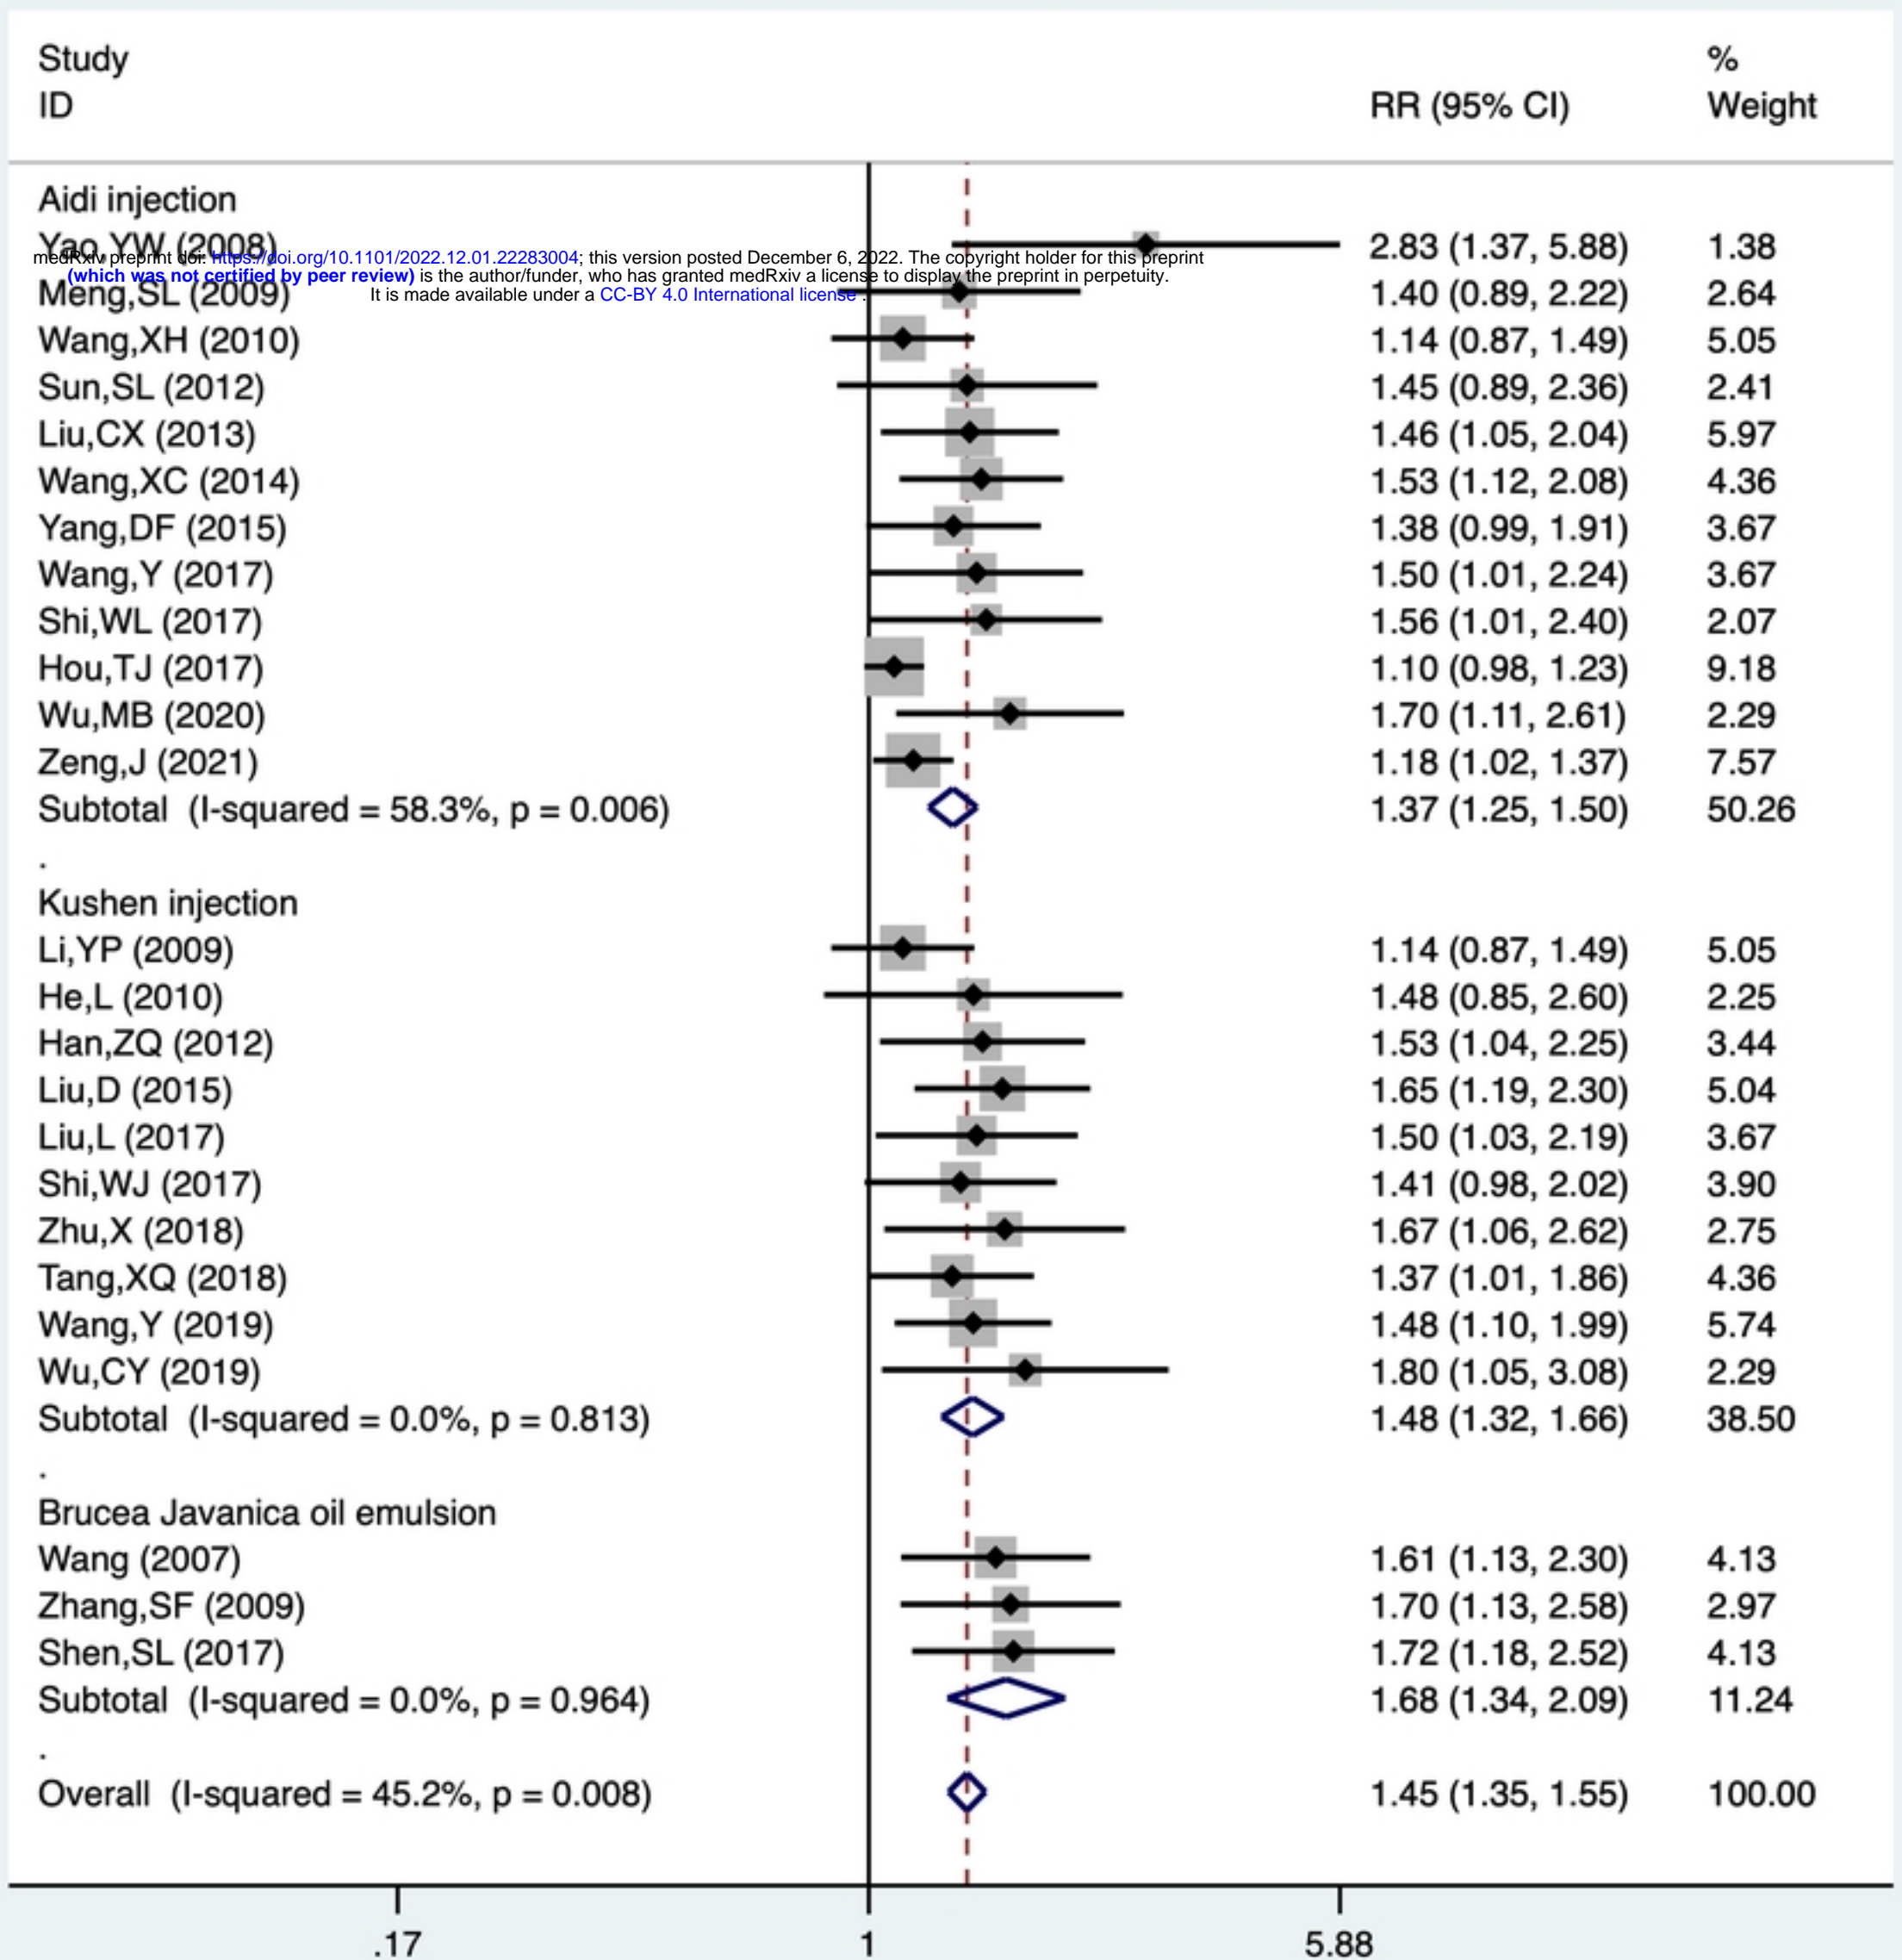

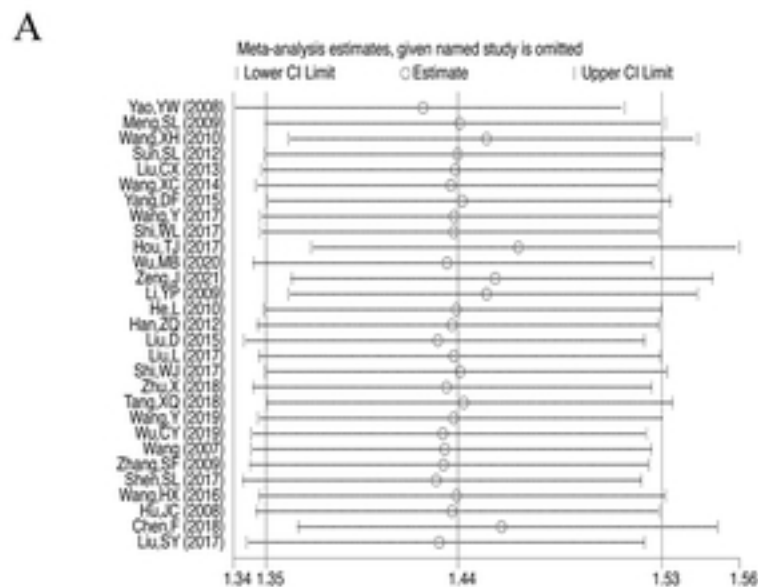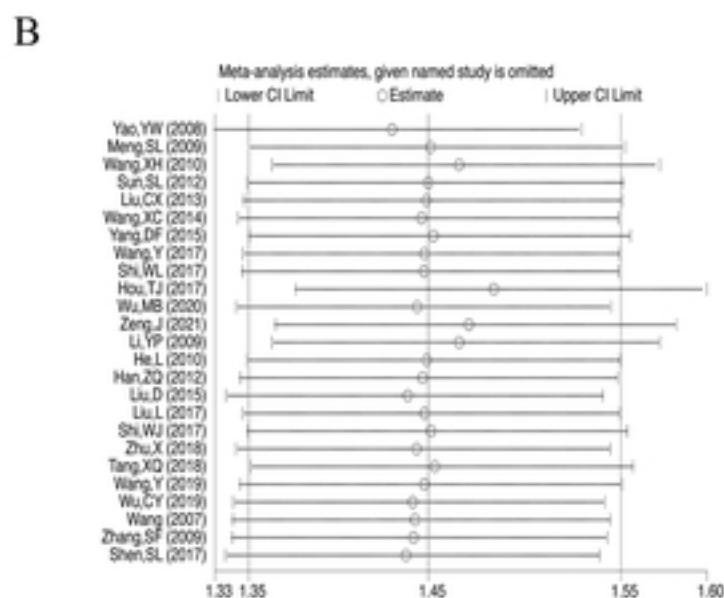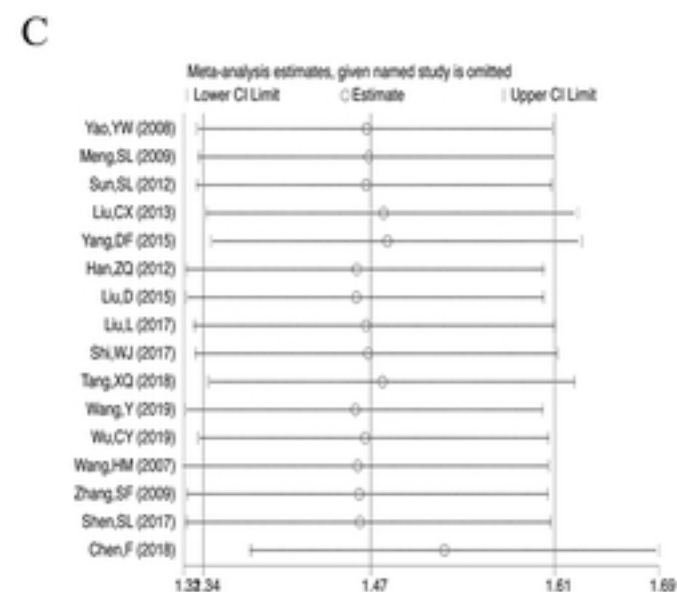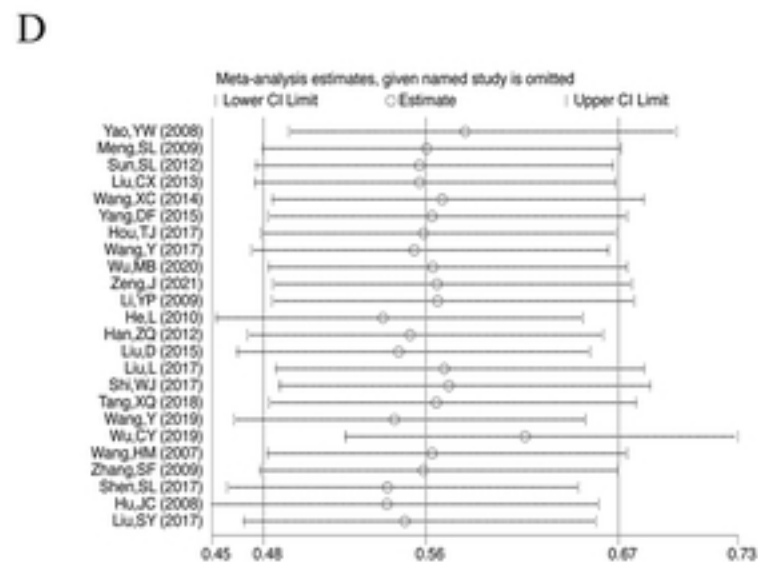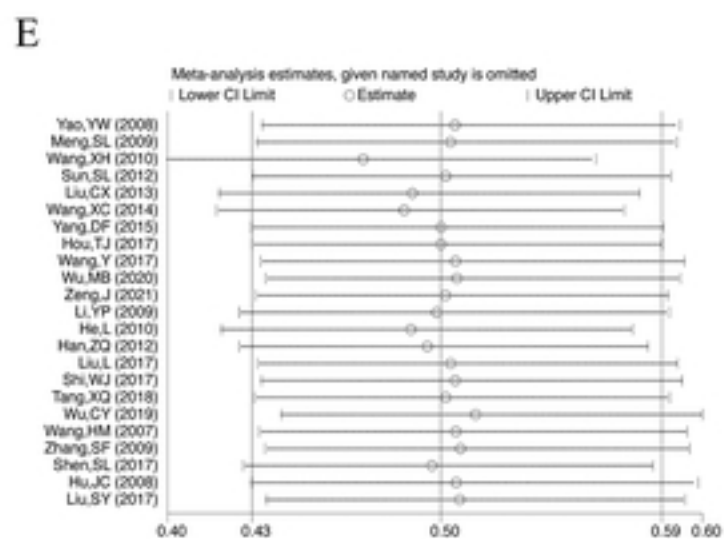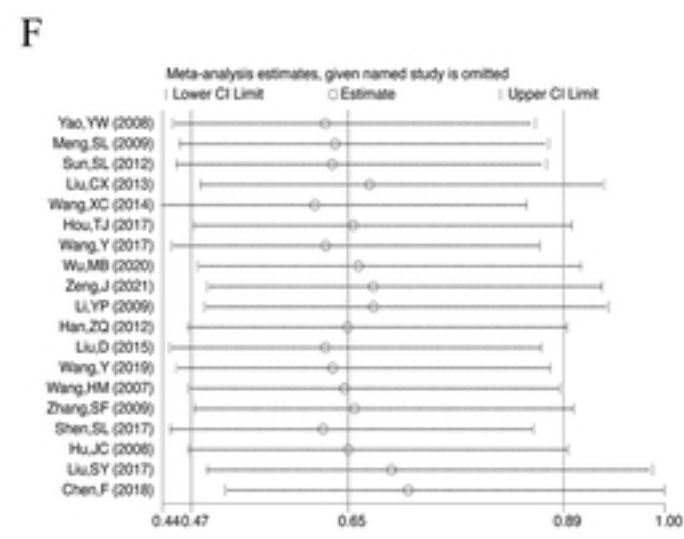

A

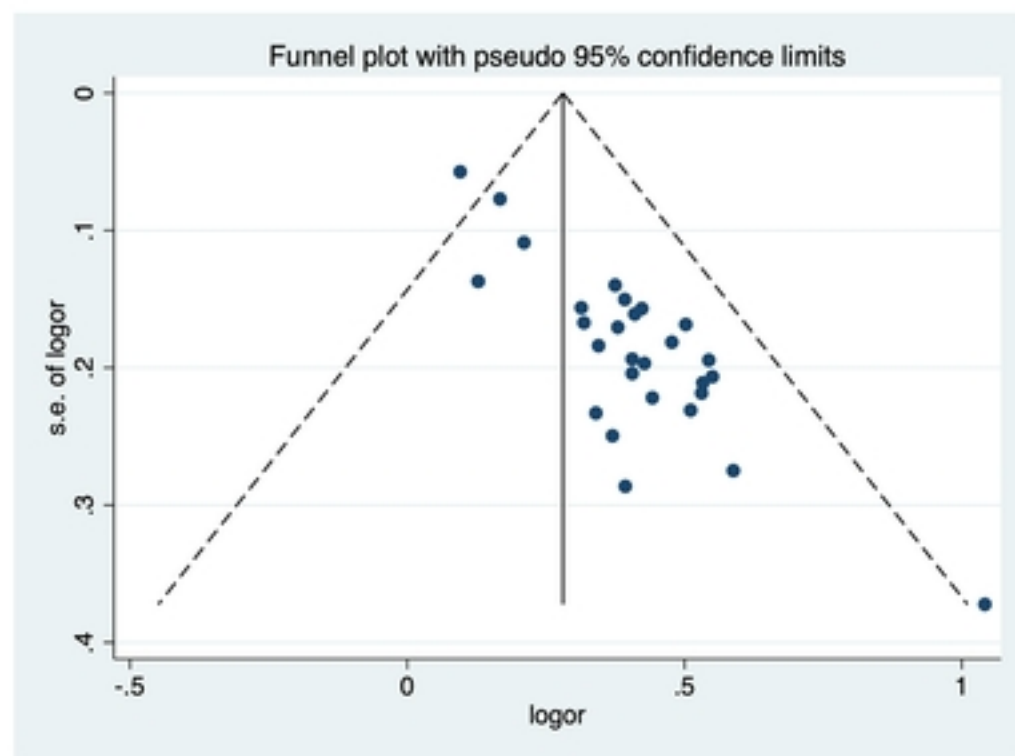

B

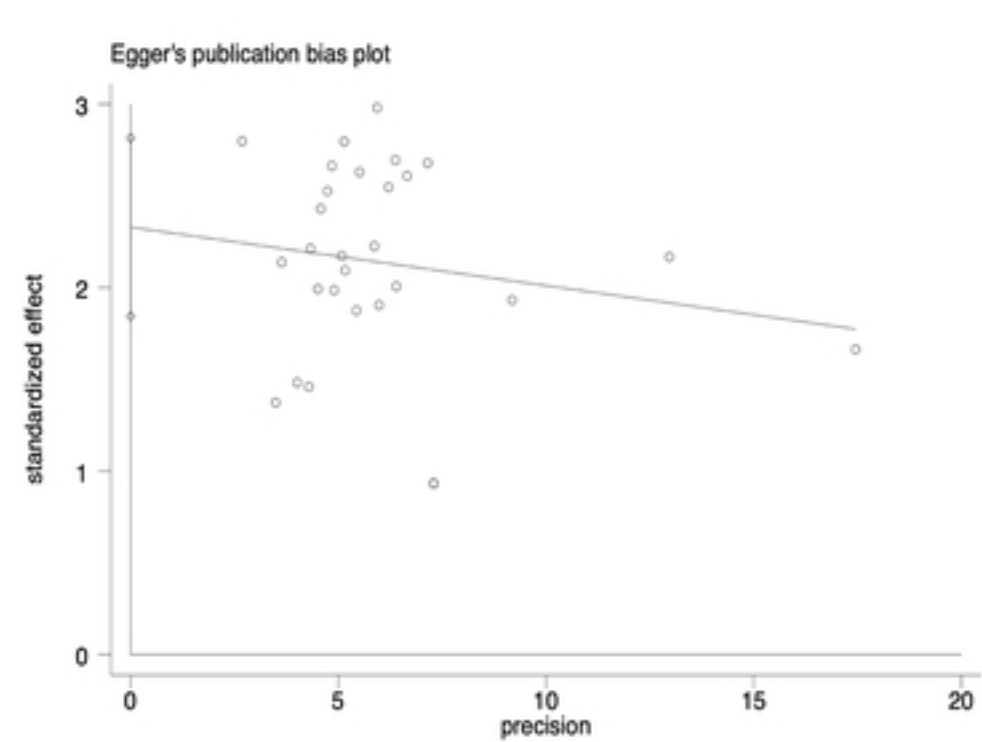

C

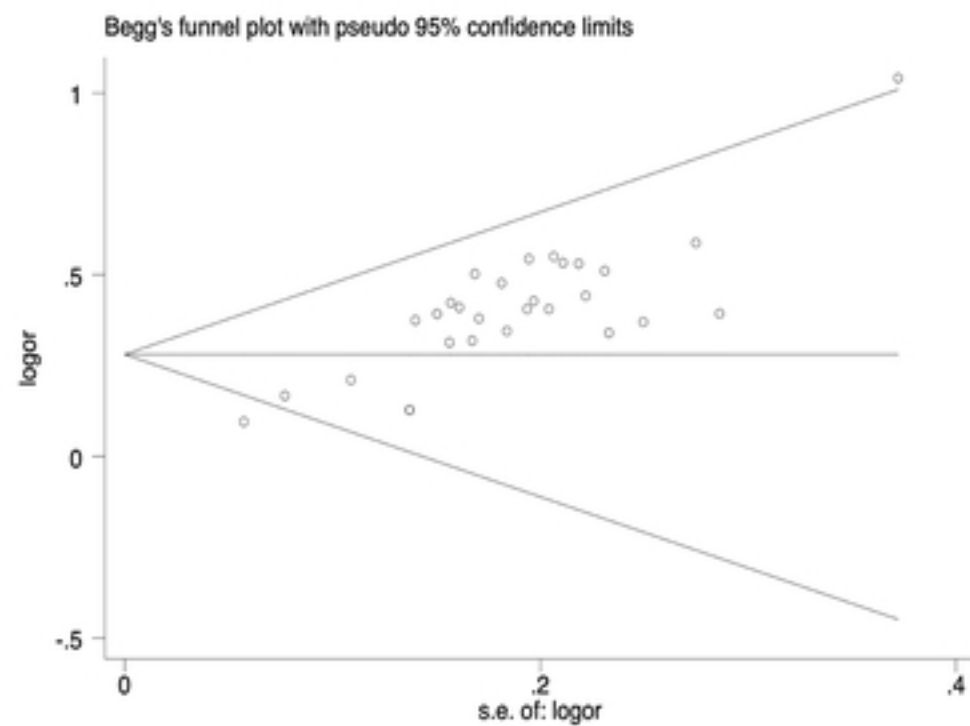

D

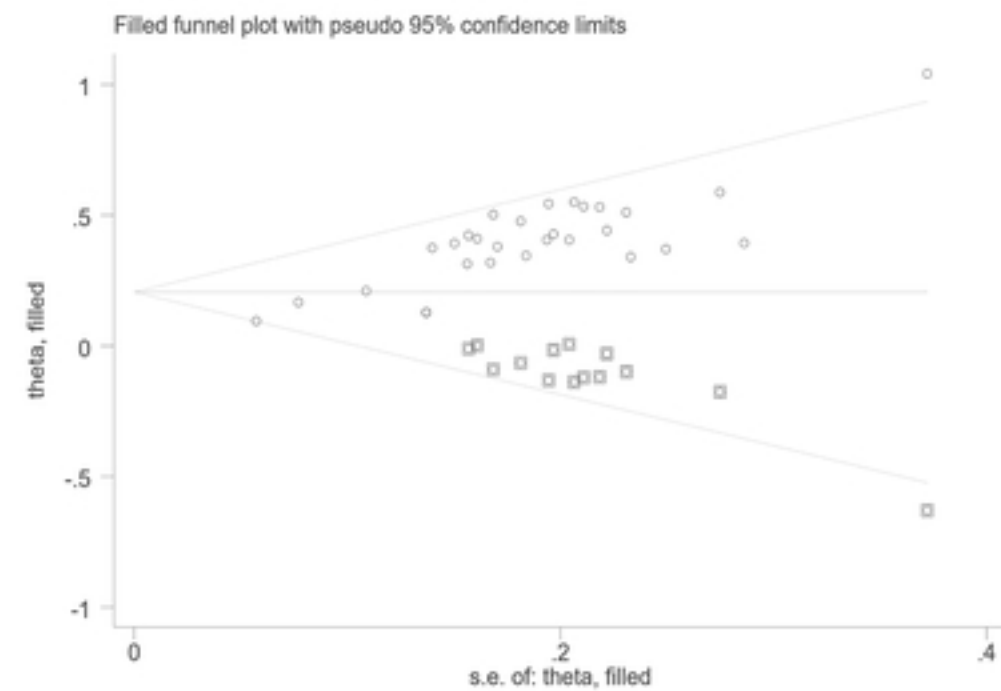

## Identification of studies via databases and registers

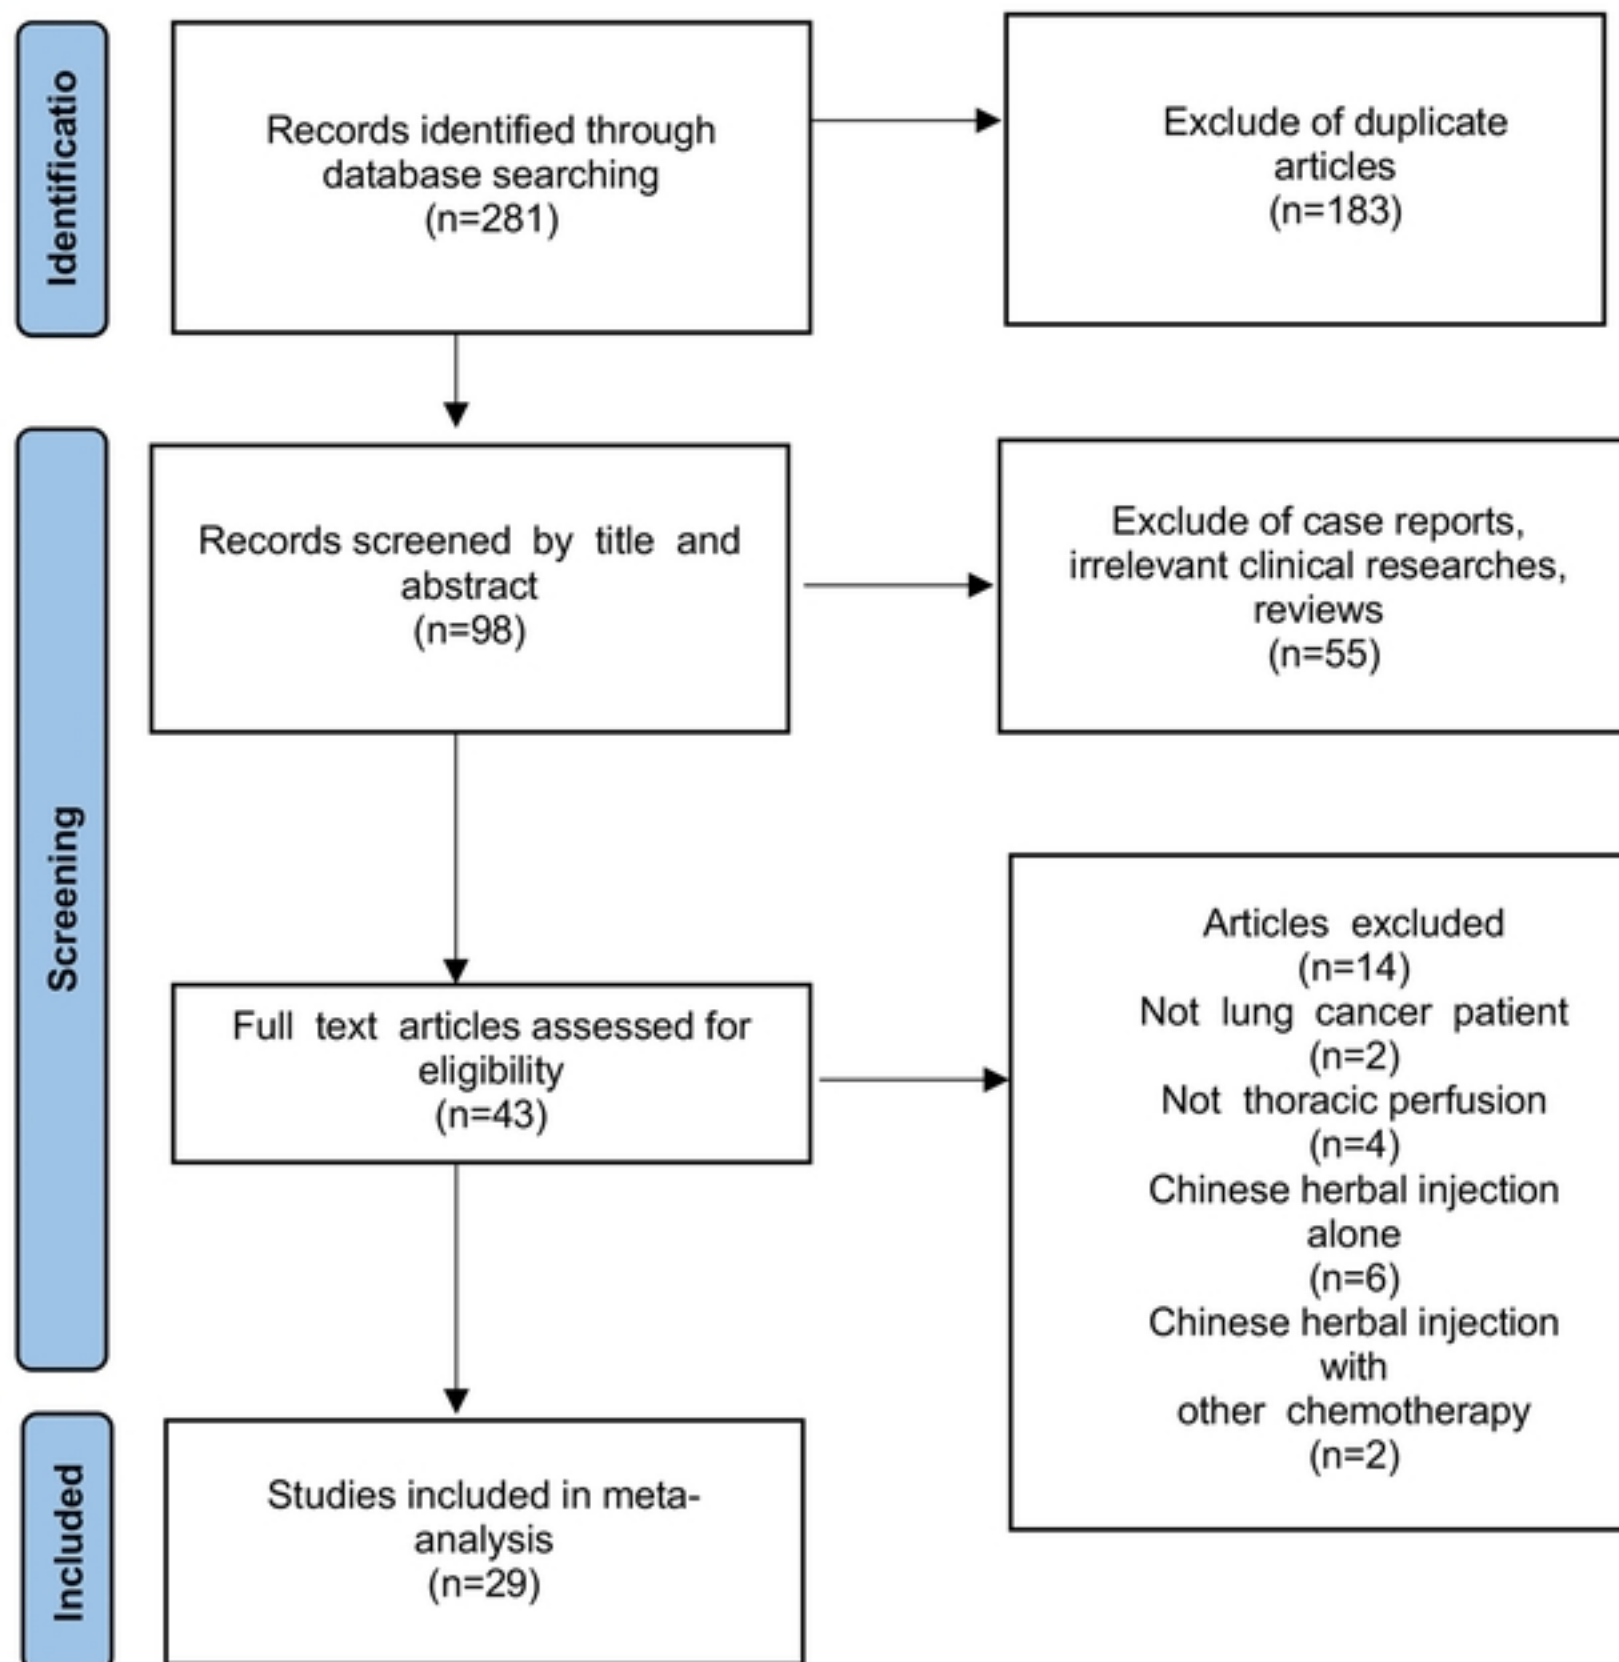

Figure.1
